# Supplementary material for: Quantifying the Cenozoic marine diatom deposition history: links to the C and Si cycles
Source: Copernicus journal article supplement (doi:10.5194/bg-13-6003-2016), 2016-11-02
Supplement: Supplementary file 1 [file Renaudie - Quantifying the Cenozoic marine diatom deposition history - Supplementary File 1.xls]

## Sheet: Smear Slides data
Site	Depth (mbsf)	Age (Gradstein et al. 2012)	Diatoms	Radiolarians	Silicoflagellates	Sponge spicules	Biogenic opal (total)
62	91.33	3.62661		6			6
62	92.24	3.65289		6			6
62	100.1	3.87991		15			15
62	214.1	7.17253		23			23
62A	17.4	1.49131		6			6
62A	25.6	1.72815		6			6
62A	36.5	2.04297		6			6
62A	72.1	3.07119		6			6
62A	75.86	3.17979		6			6
62A	99.43	3.86056		6			6
62A	128.1	4.68862		6			6
62A	147.1	5.23739		6			6
63	143.1	14.6402		27			27
64	9.1	0.371968	3	24			27
64	103.6	4.23471	1	1			2
64	108.1	4.41865	10	25			35
64	418.1	17.0161	1	1			2
64	514.1	20.1522		55			55
64	613	24.4238		55			55
64	705	29.2888		55			55
64	777.6	33.128		6			6
64	849.06	37.0285		12			12
64	850.94	37.1322		13			13
64A	451.1	16.405		16			16
64A	470.1	16.9269		55			55
64A	479.1	17.174		55			55
64A	569.44	19.594		23			23
64A	571.1	19.6375		23			23
64A	749.1	27.6518		16			16
64A	915.6	35.1121		23			23
64A	972.1	37.321		31			31
125	38.1	2.61374	2				2
132	10	0.525785		2			2
137	300.86	72.5606		1			1
139	607.34	21.786	2				2
142	368.97	3.09512	2				2
144A	21.73	25.6173		3			3
144A	23.75	32.6046		3			3
144A	43.5	35.5839		2			2
144A	45	35.8101		2			2
144A	46.53	36.0402		5			5
144A	47	36.0995		2			2
144A	140.91	58.9581		2			2
144A	145.21	60.5318		2			2
144B	5.75	4.87815		2			2
158	0.02	0.236424	1	23			24
158	0.5	0.254102		23			23
158	0.9	0.268834		12			12
158	1.05	0.274358	1				1
158	1.76	0.300508	1	32			33
158	2.4	0.324079		1			1
158	2.9	0.342494		1			1
158	3.85	0.377482		23			23
158	4.6	0.405105	1	29			30
158	4.6	0.405105	1	24			25
158	9.7	0.592937		14			14
158	9.92	0.60104	1	23			24
158	10.48	0.621664	8	19			27
158	10.58	0.625347	13	13			26
158	11.27	0.65076		1			1
158	11.72	0.667334	1	14			15
158	13.45	0.731049		23			23
158	14.88	0.783716	1	23			24
158	15.11	0.792187		15			15
158	16.6	0.847063	23	55			78
158	16.6	0.847063	23	23			46
158	18.42	0.914094		14			14
158	18.81	0.928458	1	23			24
158	21.19	1.01611	1	23			24
158	22.39	1.06031	1	23			24
158	23.29	1.09346		1			1
158	24.42	1.13507		1			1
158	25.7	1.18222		23			23
158	26.62	1.2161		1			1
158	27.14	1.23525		23			23
158	27.34	1.24262	15	32			47
158	27.34	1.24262	15	36			51
158	29.11	1.30781		23			23
158	30.72	3.21485		14			14
158	30.82	3.21873		14			14
158	32.53	3.28509		23			23
158	33.1	3.30721	23	55			78
158	36.36	3.43373		23			23
158	39.74	3.5649		23			23
158	42.8	3.68366		23			23
158	45.1	3.77292	23	55			78
158	48.99	3.92389	1	14			15
158	53.35	4.09309	1	23	1		25
158	54.1	4.1222	1	55			56
158	54.9	4.15325		23			23
158	58.3	4.28519	14	14	1		29
158	63.1	4.47148	1	55			56
158	65.47	4.56345	14	14			28
158	66.96	4.62128	1	23			24
158	72.1	4.82076	1	55			56
158	74.33	4.9073	1	23	1		25
158	78.6	5.07301	1	23			24
158	81.1	5.17003	1	55			56
158	83.25	5.25347	1	23	1		25
158	87.75	5.42811	23	23	1		47
158	90.1	5.51931	1	55			56
158	91.7	5.58141	1	23			24
158	92.35	5.60663	1	23			24
158	96.93	5.78438	29	29			58
158	97.31	5.79912	25	25	11		61
158	99.2	5.87247	1	55			56
158	101.59	5.96523	9	9			18
158	103.25	6.02965	35	15			50
158	105.75	6.12667	25	25			50
158	108.1	6.21787	1	55			56
158	114.8	6.47789	10	22			32
158	116.4	6.53998	1	33			34
158	117.1	6.56715	1	55			56
158	119.15	6.64671	1	23	1		25
158	122.27	6.76779	23	23	12		58
158	123.89	6.83066	1	29			30
158	126.1	6.91643	1	55			56
158	127.07	6.95407	14	34	14		62
158	129.99	7.0674	23	23	23		69
158	132.45	7.16286	16	16	16		48
158	135.29	7.25014	1	55			56
158	135.74	7.26345	1	23	1		25
158	136.46	7.28473	1	1	23		25
158	140.21	7.39559	1	23	23		47
158	144.22	7.51414	23	55			78
158	147.89	7.62263	23	23	23		69
158	148.52	7.64126	16	16	16		48
158	151.44	7.72758	23	23	1		47
158	153.34	7.78375	23	55			78
158	155.13	7.83667	23	55	1		79
158	156.52	7.87776	1	55	23		79
158	160.21	7.98685	23	55	1		79
158	162.1	8.04272	23	55			78
158	162.96	8.06927	1	55	23		79
158	164.4	8.11748	1	23	1		25
158	167.01	8.20485	1	55	1		57
158	171.36	8.35048	23	55			78
158	171.78	8.36454		23	1		24
158	172.22	8.37927	14	34	1		49
158	177.37	8.55168	1	23			24
158	180.38	8.65244	23	55			78
158	180.51	8.65679	1	23	1		25
158	181.16	8.67856		23			23
158	181.63	8.69429	1	55	1		57
158	182.86	8.73547	23	55	1		79
158	183.21	8.74718	1	23			24
158	184.14	8.77832	23	23	23		69
158	187.6	8.89415	23	55			78
158	195.22	9.14924	1	55	1		57
158	195.42	9.15594	1	23			24
158	196.32	9.18607	1	13			14
158	198.1	9.24566	23	55			78
158	201.33	9.35379	1	23			24
158	205.6	9.49673	23	55			78
158	209.14	9.61524	1	35	14		50
158	209.25	9.61893	11	27	1		39
158	210.75	9.66914	1	13			14
158	210.9	9.67416	1	23	1		25
158	211.6	9.6976	23	55			78
158	218.8	9.93863	1	23	1		25
158	225.1	10.1495	1	55			56
158	226.86	10.2085	1	1	0		2
158	234.36	10.4595	1	55			56
158	235.09	10.484	1	23	1		25
158	242.99	10.7484	1	1	1		3
158	244.44	10.797	1	23			24
158	248.91	10.9466	1	1			2
158	248.91	10.9466	1	1			2
158	248.91	10.9466	1	1			2
158	248.91	10.9466	1	1			2
158	248.96	10.9483	1	1			2
158	252.39	11.0631	1	55			56
158	254.46	11.1324	1	1	1		3
158	256.6	11.2041	1	55			56
158	261.82	11.3788	1	1			2
158	262.12	11.3889	1	1			2
158	270.1	11.656	1	55			56
158	270.48	11.6687	1	1	1		3
158	271.6	11.7062	55	55			110
158	280.2	11.9941	1	23			24
158	283.02	12.0885	23	23	1		47
158	283.09	12.0909	1	1	1		3
158	285.1	12.1582	55	23			78
158	287.96	12.2539	1	1	1		3
158	288.2	12.2619	1	1			2
158	290.1	12.3255	55	55			110
158	296.7	12.5465	1	1			2
158	296.75	12.5482	23	55			78
158	297.6	12.5766	23	55			78
158	305.1	12.8277		1			1
167	731.1	75.0583		6			6
167	768.1	76.1791		4			4
167	780.1	80.8593		4			4
170	92.1	79.5495		4			4
170	106.84	84.9265		6			6
170	110.1	86.1157		29			29
170	110.1	86.1157		6			6
170	113.6	87.3924		4			4
170	114.6	87.7572		4			4
171	202.6	71.1428		6			6
171	224.25	72.486		11			11
171	231.1	72.9109		6			6
171	232.05	72.9699		3			3
171	237.4	73.3018		14			14
171	250.1	74.0897		3			3
171	261	74.7659		4			4
171	267	75.1381		4			4
171	269.1	75.2684		4			4
171	270.6	75.3615		4			4
171	291.6	83.4078		14			14
171	291.6	83.4078		3			3
171	304.6	90.4195		15			15
171	320	93.1203		2			2
171	328.45	94.6022		4			4
171	329	94.6987		3			3
171	329.6	94.8039		3			3
173	6.8	0.373938	2	2			4
173	8.3	0.406605	1	2			3
173	9.8	0.439272	2	2			4
173	11.3	0.471939	2	2			4
173	13.5	0.519851	1	2			3
173	16	0.574296	2	2			4
173	17.5	0.606963	2	1			3
173	19	0.63963	1				1
173	20.5	0.672297	1				1
173	21.3	0.689719	2				2
173	23.5	0.737631	1				1
173	25.5	0.781187	3	2			5
173	27	0.813854	2	2			4
173	28.5	0.846521	1	2			3
173	30	0.879188	3	2			5
173	31.5	0.911855	4	2			6
173	35.3	0.994611	3	2			5
173	38	1.05341	2	2			4
173	39.5	1.08608	1	1			2
173	41	1.11875	1	2			3
173	46	1.22764	2	0			2
173	47.5	1.2603	2	2			4
173	54	1.40186	1	2			3
173	55.5	1.43453	1	2			3
173	57	1.46719	2	2			4
173	63.5	1.60875	2	2			4
173	66.5	1.67409	4	2			6
173	68	1.70675	1	2			3
173	76.3	1.88751	2	2			4
173	82.5	2.02253	2	2			4
173	85.5	2.08787	2	1			3
173	87	2.12053	4	2			6
173	92	2.22942	1	1			2
173	93.5	2.26209	2	2			4
173	96.5	2.32743	1	6			7
173	101.8	2.44285	3				3
173	103.3	2.47552	5	2			7
173	104.8	2.50818	3	2			5
173	106.1	2.53649	1	2			3
173	107.8	2.57352	4	6			10
173	109.3	2.60618	1	2			3
173	111.25	2.64865	5	6			11
173	112.75	2.68132	15	6			21
173	114.25	2.71399	10	6			16
173	117.25	2.77932	4	2			6
173	117.45	2.78368	1				1
173	120.5	2.8501	7	2			9
173	122	2.88277	2	2			4
173	123.5	4.66063	5	1			6
173	131.5	4.82511	10	2			12
173	134.5	4.8868	10	1			11
173	134.9	4.89502	25	2			27
173	139.5	8.63323	50	1			51
173	142.5	8.72028	64	1			65
173	151.6	8.98435	70	1			71
173	152	8.99596	71	2			73
173	160	9.2281	75	2			77
173	171	9.5473	70	1			71
173	173.1	9.60824	4	2			6
173	179	9.77945	60				60
173	180.5	9.82298	80				80
173	187	12.5197	80				80
173	188.5	12.5404	80				80
173	191.3	12.5788	55				55
173	191.33	12.5793	85				85
173	198	12.6709	70				70
173	199.5	12.6916	85	2			87
173	201	12.7122	76	1			77
173	202.5	12.7328	75	1			76
173	207.5	12.8015	67	3			70
173	209	12.8221	75				75
173	215.8	12.9156	55	1			56
173	217	12.9321	60				60
173	218.5	12.9527	60				60
173	220	12.9733	60				60
173	221.5	12.9939	80				80
173	225	13.0421	85				85
173	226.5	13.0627	60				60
173	228	13.0833	70				70
173	229.5	13.1039	70				70
173	231	13.1245	72	2			74
173	236	13.1932	60				60
173	237.5	13.2139	61				61
173	245.5	13.3238	79				79
173	247	13.3444	61	1			62
173	248.5	13.3651	60				60
173	253.9	13.4393	60				60
173	255	13.4544	72	1			73
173	255.18	13.4569	40	2			42
173	255.32	13.4588	20	3			23
173	256.5	13.475	50				50
173	262.74	13.5608	95				95
173	264.6	13.5864	53	1			54
173	271.78	13.685	82				82
173	282.4	18.1609	50				50
178	73	0.549276	15				15
178	74.37	0.567305	1				1
178	74.5	0.569015	3				3
178	81.72	0.664028	1				1
178	81.93	0.666791	2	2			4
178	81.96	0.667186	1				1
178	82.11	0.66916	2	2			4
178	89.98	0.772726	2	2			4
178	97	0.865107	2				2
178	97.1	0.866423	50				50
178	97.95	0.877608	2	2			4
178	100.18	0.906954	75				75
178	106.2	0.986175	75				75
178	109	1.02302	2				2
178	124.4	1.22568	2				2
178	124.7	1.22963	10				10
178	125.5	1.24016	20				20
178	135.08	1.36622	95				95
178	136.35	1.38294	30				30
178	136.65	1.38689	25	2			27
178	137.3	1.39544	50				50
178	137.5	1.39807	2	2			4
178	142.25	1.46058	2				2
178	148	1.53625	2	2			4
178	148.24	1.53941	2				2
178	151.35	1.58033	10	2			12
178	151.7	1.58494	10				10
178	152.02	1.58915	20				20
178	153.7	1.61126	3				3
178	154.05	1.61586	2				2
178	160	1.69416	2				2
178	160.25	1.69745	2	2			4
178	160.98	1.70706	2	2			4
178	162.8	1.73101	2	2			4
178	163.1	1.73496	2	2			4
178	170.5	1.83234	2	2			4
178	171.73	1.84852	2	2			4
178	174.48	1.88471	2	2			4
178	179.6	1.95209		2			2
178	179.95	1.9567		2			2
178	187.05	2.05013	2	2			4
178	187.15	2.05145		2			2
178	196.45	2.17383	2				2
178	197.8	2.1916	1				1
178	198.53	2.2012	5				5
178	224.45	2.5423	15				15
178	224.58	2.54401	5				5
178	255.9	2.99052		6			6
178	289	3.4759	2	2			4
178	289.28	3.48	15				15
178	289.62	3.48499	1	2			3
178	297.9	3.60641	3				3
178	298.3	3.61227	20				20
178	298.54	3.61579	30				30
178	306.9	3.73838	3	2			5
178	307.2	3.74278	15				15
178	307.75	3.75085	10				10
178	308.77	3.7658	3				3
178	308.83	3.76668	3				3
178	309.55	3.77724	3				3
178	310.15	3.78604	30	2			32
178	310.45	3.79044	35	2			37
178	316.9	3.88502	2	2			4
178	320.58	3.93899	2	2			4
178	321.1	3.94661	2	2			4
178	321.37	3.95057	20				20
178	322	3.95981	20				20
178	322.95	3.97374	20				20
178	325.45	4.0104	30	1			31
178	326.1	4.01993	2				2
178	326.35	4.0236	8				8
178	327	4.03313	25				25
178	327.5	4.04046	30				30
178	328.5	4.05512	2				2
178	329	4.06246	25				25
178	330	4.07712	50				50
178	330.5	4.08445	35				35
178	331.5	4.09912	1				1
178	331.8	4.10351	50				50
178	333.13	4.12302	60				60
178	333.2	4.12404	50				50
178	333.8	4.13284	55				55
178	335.87	4.1632	1				1
178	336.8	4.17683	50				50
178	336.97	4.17933	1				1
178	337.26	4.18358	30				30
178	345.2	4.30001	55				55
178	345.42	4.30324	30				30
178	345.8	4.30881	30				30
178	346.5	4.31907	2				2
178	346.57	4.3201	70				70
178	346.59	4.32039	15				15
178	346.9	4.32494	5				5
178	353.9	4.42759	15				15
178	354.1	4.43052	70				70
178	354.55	4.43712	4				4
178	354.7	4.43932	20				20
178	354.74	4.43991	3				3
178	355.35	4.44885	30				30
178	356.44	4.46483	30				30
178	356.62	4.46747	95				95
178	357.13	4.47495	3				3
178	357.25	4.47671	30				30
178	357.6	4.48184	30				30
178	358.77	4.499	70				70
178	359.24	4.50589	70				70
178	359.43	4.50868	20				20
178	383.18	4.85695	60				60
178	383.3	4.85871	30				30
178	395.15	11.8694	2				2
178	398.3	11.9562	2				2
178	398.8	11.97	30				30
178	399.3	11.9838	6				6
178	400.3	12.0113	75				75
178	447.67	13.3171	2				2
178	457	13.5742	2				2
178	457.82	13.5968	85				85
178	457.86	13.5979	85				85
178	458.4	13.6128	85				85
178	459.22	13.6354	2				2
178	459.88	13.6536	70				70
178	460.65	13.6748	15				15
178	461.05	13.6859	90				90
178	462.45	13.7245	3				3
178	462.95	13.7382	85				85
178	464.3	13.7755	70				70
178	466	13.8223	85				85
178	466.73	13.8424	1				1
178	467	13.8499	10				10
178	496.96	14.6757	2				2
178	497.44	14.6889	3				3
178	629.45	18.3278	2				2
178	630.36	18.3528	2				2
178	631.17	18.3752	30				30
178	632.32	18.4069	90				90
178	632.95	18.4242	2				2
178	688.8	19.9637	35				35
178	716.7	20.7328	1				1
178	718.2	20.7741	2				2
178	718.49	20.7821	2				2
178	742.4	21.4412	3				3
178	742.95	21.4563	2	1			3
178	743.68	21.4765	1				1
178	743.78	21.4792	3				3
178	744.5	21.4991	20				20
192	0.5	0.0296463	15				15
192	0.66	0.0391331	10				10
192	1.35	0.080045	20				20
192	2.48	0.147046	80				80
192	3.35	0.19863	70				70
192	6.2	0.367614	25	2			27
192	10.9	1.52023	20				20
192	11.35	1.52927	10				10
192	15.26	1.60789	30				30
192	26.3	1.82986	30				30
192	27.1	1.84595	40				40
192	27.36	1.85117	60	1			61
192	27.8	1.86002	90				90
192	33.5	1.97401	35	2			37
192	34.8	1.98555	70				70
192	57.25	2.18491	70				70
192	76.5	2.35585	35				35
192	79.5	2.38249	35				35
192	93.35	2.50548	45				45
192	95.6	2.52546	2				2
192	96.25	2.53124	45				45
192	98.76	2.55352	45				45
192	123.25	2.771	45				45
192	150.2	3.01032	58				58
192	154.8	3.05117	58				58
192	178.2	3.25896	80				80
192	233.65	3.75137	85				85
192	233.7	3.75181	85				85
192	234.9	3.76247	85				85
192	238.2	3.79177	75				75
192	239.4	3.80243	75				75
192	269.4	4.06883	72				72
192	269.8	4.07238	75	1			76
192	298.75	4.32946	95				95
192	299.3	4.33435	90				90
192	327.4	4.58388	80				80
192	356.52	4.84247	50	2			52
192	391.3	5.15132	60	2			62
192	393.85	5.17396	60	2			62
192	475.1	5.89547	65				65
192	477.85	5.91989	65				65
192	571.25	6.7493	60				60
192	571.25	6.7493	15				15
213	0.8	0.745728	20	35			55
213	0.95	0.755438	20	75	2		97
213	1.63	0.799457	52	25			77
213	1.78	0.809167	5	83	2		90
213	4.21	0.96647	47	40			87
213	5.09	1.02344	60	10			70
213	5.2	1.03056	49	36	1		86
213	9.2	1.28949	50	32			82
213	9.75	1.3251	79	7	2		88
213	9.8	1.32833	69	20	2		91
213	10.31	1.36135	52	15			67
213	10.64	1.38271	2				2
213	11.06	1.4099	60	34	2		96
213	11.1	1.41249	49	20	1		70
213	12.7	1.5203	50	30	2		82
213	12.96	1.53895	50	38	2		90
213	16.6	1.80015	52	20	2		74
213	19.08	1.97811	61	20	1		82
213	19.74	2.02547	75	12	2		89
213	23.24	2.27663	65	25	1		91
213	26.75	2.5285	67	10	1		78
213	26.91	2.53998	75	15	1		91
213	28.14	2.62824	43	25	5		73
213	28.4	2.6469	75	16	1		92
213	28.7	2.66843	58	25	3		86
213	28.73	2.67058	97	1	1		99
213	41.73	3.73535	60	20	5		85
213	46.02	4.08952	60	15	1		76
213	47.03	4.17291	52	25	3		80
213	48.28	4.2761	70	20	2		92
213	48.51	4.29509	53	25	1		79
213	50.03	4.42058	71	15	1		87
213	56.53	5.07468	58	25	4		87
213	57.04	5.12938	56	20	1		77
213	58.95	5.33424	51	25	2		78
213	65.45	6.04907	25	20	2		47
213	65.85	6.09389	5	10	1		16
213	69.69	6.52421	10	10	1		21
213	69.74	6.52981	59	25	1		85
216	189.5	23.8757		2			2
216	206.84	26.1184		2			2
216	226.1	28.6059		2			2
216	235.6	29.8588		2			2
216	245.35	31.4659		2			2
216	254.4	33.2206		2			2
217	231.3	26.4774		2			2
217	233.1	26.6301		2			2
217	238.5	27.0883		1			1
217	268.9	29.6679		2			2
217	275.3	30.1284		2			2
217	307.29	32.3518		2			2
217	310.29	33.2157		1			1
217	313.29	34.1485		3			3
217	346.3	43.3554		5			5
217	352.3	46.0182		5			5
219	1.75	0.251879		15			15
219	2.9	0.315074		5			5
219	4.4	0.397502		5			5
219	6.7	0.523892	5				5
219	8.8	0.639291	5				5
219	9.9	0.699739		5			5
219	12.1	0.820633	10	5			15
219	13.15	0.878333	5				5
219	15.8	1.02396	5				5
219	17	1.0899	5	5			10
219	20.1	1.26025	10				10
219	45.8	3.56859	5				5
219	46.3	3.62633	5				5
219	184.05	36.3707	2				2
219	188.53	37.4649	2				2
219	190.05	37.8361	2				2
219	191.55	38.2025	2	10			12
219	193.15	38.5932	5	5			10
219	194.65	38.9596	5	5			10
219	196.15	39.3259	5	2			7
219	197.65	39.6923	5	5			10
219	199.15	40.0586	5	10			15
219	202.25	40.8157		20			20
219	203.71	41.1723		20			20
219	204.82	41.4434		5			5
219	206.3	41.8048		30			30
219	207.9	42.1956		20			20
219	212.8	43.3923		30			30
219	214.4	43.8124		30			30
219	215.5	44.1041		5			5
223	0.5	0.49844	5	0			5
223	1.4	0.508226	5	0			5
223	2.5	0.520187	5	5			10
223	4	0.536498	2				2
223	4.6	0.543022	2	0			2
223	29	0.808339	2	0			2
223	29.4	0.812688	2	6			8
223	30	0.819212	5	0	2		7
223	31.5	0.835523	2	0			2
223	32.8	0.849659	2				2
223	33.5	0.85727	2				2
223	36.8	0.893153	2				2
223	36.89	0.894132	5	0			5
223	37.1	0.896415	2				2
223	143	2.04793		2			2
223	144.3	2.06207		10			10
223	145.1	2.07077		5			5
223	146.4	2.0849		15			15
223	147.8	3.71157		5			5
223	149.7	3.75945		5			5
223	150.74	3.78566		5			5
223	157.2	3.94844		10			10
223	159.1	3.99632	2	10			12
223	170.2	4.27603	2	10			12
223	170.9	4.29367		2			2
223	225.2	5.66198		2			2
223	228.2	5.73758		3			3
223	231.4	5.81821		5			5
223	233.3	5.86609		2			2
223	251.1	6.31463		0			0
223	271.7	6.83373		2			2
223	273.2	6.87153		5			5
223	278	6.99249		2			2
223	278.7	7.01013		5			5
223	290.8	7.31503		1			1
223	290.98	7.31957		1			1
223	293.1	7.37299		5			5
223	309.8	7.79382		2			2
223	312.2	7.85429		2			2
223	312.7	7.86689		8			8
223	313.2	7.87949		2			2
223	314.6	7.91477		5			5
223	316	7.95005		2			2
223	316.3	7.95761		3			3
223	318	8.00045		20			20
223	318.4	8.01053		5			5
223	329.1	8.28016		5			5
223	330.1	8.30536		15			15
223	331.3	8.3356		2			2
223	333	8.37843		2			2
223	336.2	8.45907		2			2
223	337.1	8.48175		5			5
223	348.45	8.76776		5			5
223	349.2	8.78666		3			3
223	351	8.83202	2	2			4
223	351.6	8.84714		1			1
223	367.05	9.23646		30			30
223	367.2	9.24024	2				2
223	368.85	9.28182	1	2			3
223	369.5	9.2982	3		2		5
223	371	9.336		3			3
223	374.25	9.41789	1	5			6
223	378.1	9.51491	1	2			3
223	385	9.68878		2			2
223	387.8	9.75934		2			2
223	392.3	9.87274	2	2			4
223	393.1	9.8929	3	3			6
223	394.45	9.92691	5				5
223	395.4	9.95085	5				5
223	398.45	10.0277		10			10
223	399.5	10.0542		7			7
223	400.6	10.0819		25			25
223	402.4	10.1272		2			2
223	403.85	10.1638	2	10			12
223	407	10.2432	2	2			4
223	408.1	10.2709		35			35
223	409.15	10.2973	2	5			7
223	409.24	10.2996		30			30
223	409.9	10.3162		2			2
223	411.1	10.3465	2	5			7
223	413.25	10.4007		1			1
223	413.9	10.417		10			10
223	414	10.4196		1			1
223	415	10.4448		30			30
223	416.25	10.4763		15			15
223	416.8	10.4901		30			30
223	420.52	10.5839		20			20
223	421.42	10.6065		10			10
223	421.6	10.6111		1			1
223	469.95	13.7762		0			0
223	499.2	26.3859		2			2
224	95.95	5.90753	5	5			10
224	96.37	5.92763	5	15			20
224	96.65	5.94103	5	15			20
224	97.1	5.96256	5	10			15
233	3.9	0.383067		1			1
233	5.9	0.437382	3				3
233	18.4	0.776851		2			2
233	28.17	1.04218		2			2
233	37.3	1.29013	2	2			4
233	40.65	1.3811	1				1
233	45.3	1.50739	2	1			3
233	48.3	1.58886	2				2
233	53.3	1.71874	2	2			4
233	58.3	1.76836	2	2			4
233	64.8	1.83288	2				2
233	67.8	1.86266	2	2			4
233	76.8	1.95199	2	2			4
233	86.8	2.05124	2	2			4
233	96.3	2.14553	2	2			4
233	103.8	2.21997	2	2			4
233	113.3	2.31427	2	2			4
233	134.3	2.5227	2	8			10
233	141.8	2.59714	2	5			7
233	162.4	2.80081		5			5
233	173.2	2.90671	2	2			4
233A	169.6	2.8581	2	5			7
233A	208.3	3.21755		5			5
233A	209.48	3.22851		2			2
233A	231.8	3.43582		2			2
236	2.22	0.566491	20	60			80
236	3.8	0.766096	15	50			65
236	6.1	1.05666	3	10			13
236	7.7	1.25879		15			15
236	8.1	1.30933	1	0			1
236	16.8	2.06097		2			2
236	20.33	2.21252		2			2
236	71.55	5.69081		3			3
236	78.2	5.87925		5			5
236	89.46	6.20583		5			5
236	89.66	6.21393		2			2
236	92.43	6.32612		2			2
236	103	6.75426		5			5
236	105.84	6.8693		5			5
236	107.4	6.93248		10			10
236	118.8	7.47311		10			10
236	118.9	7.48172		10			10
236	137.4	9.3631		1			1
236	138.14	9.48971		2			2
236	181.7	22.5188		10			10
237	82.5	6.04667		10			10
237	83.7	6.15429	1	10			11
237	90.1	6.72826	1	10			11
237	92	6.89865		5			5
237	95.92	7.25021	2	8			10
237	101.5	7.79706	5		1		6
237	111	8.94309	1	5			6
237	115.3	9.2057	2	6			8
237	120.4	9.50994	2	8			10
237	130.8	11.5145		4			4
237	140.6	13.478	1	4			5
237	148.9	13.7257	1	5			6
237	150.1	13.9673	1	3			4
237	158.4	15.766	2	5			7
237	160.98	16.2078	1	1			2
237	167.9	17.3927	1	3			4
237	177.1	18.968	1	1			2
237	186.8	22.0569	1	2			3
238	5.3	0.163021		15			15
238	9.89	0.233416		2			2
238	16.5	0.334792	1	2			3
238	23.5	0.442149		2	1		3
238	34.3	1.72717		1			1
238	37.9	1.75523		2			2
238	42.25	1.78914	2	2	3		7
238	45.6	1.81525	2	2			4
238	48	1.83396	1	4			5
238	57.4	1.90723	2	5			7
238	67	2.99444	2	5			7
238	75.3	3.29259	1	2			3
238	84.6	3.62665	1	1			2
238	95.8	4.02897	1	3			4
238	95.85	4.03077	1	3			4
238	106.5	4.41459	1	1	1		3
238	114.5	4.70547	1	2	1		4
238	126.3	5.13452		1			1
238	132.68	5.3665	1	1			2
238	134	5.4145	2	2			4
238	143.02	5.71335		2			2
238	150.84	5.9394	2	1	1		4
238	152.5	5.98739	2	2			4
238	162	6.262	1	1			2
238	166.7	6.39786		1			1
238	171.6	6.53951	1	1	1		3
238	181.5	6.82569	1	1			2
238	199.42	7.3437		1			1
238	200.2	7.36625	1	1			2
238	209.5	7.63508	1	1	1		3
238	219.3	7.92955	1				1
238	246.6	8.94918		2			2
238	249	9.03882	1	1			2
238	255.7	9.26922			1		1
238	265.4	9.59072		1			1
238	272	9.80948	1	1			2
238	274.5	9.89234		1			1
238	360	16.0608		1			1
251	5.65	0.278073		2			2
251	10.3	0.453976		2			2
251	12.05	0.520176		2			2
251	12.2	0.52585		1			1
251	13.5	0.575028		1			1
251	14.15	0.599616	2	2			4
251	14.43	0.610208		2			2
251	14.53	0.613991		1			1
251	14.94	0.629501		2			2
251	15.44	0.648415		1			1
251	16.1	0.673382		2			2
251	16.1	0.673382		2			2
251	21.9	0.892789		2			2
251	22.27	0.906785		1			1
251	23.3	0.945749		2			2
251	23.52	0.954071		1			1
251	25	1.01006		1			1
251	26.7	1.07437		1			1
251	26.91	1.08231		1			1
251	28.2	1.13111		1			1
251	30.5	1.21812		1			1
251	31.6	1.25973		4			4
251	32.8	1.30512	2	1			3
251	33.46	1.33009		2			2
251	33.65	1.33728		0			0
251	33.79	1.34257		1			1
251	35.75	1.41672		2			2
251	37.1	1.46778		1			1
251	37.27	1.47422		2			2
251	38.8	1.53209		1			1
251	39.6	1.56236		3			3
251	40.7	1.60224		1			1
251	41.1	1.61476		1			1
251	42	1.64292		1			1
251	43.9	1.70239		2			2
251	45.6	1.7556		1			1
251	46.11	1.77156	2	2			4
251	46.6	1.7869		2			2
251	48.2	1.83697		1			1
251	49.3	1.8714		1			1
251	50.65	1.91366		2			2
251	51.1	1.92774		2			2
251	52.05	1.95747		2			2
251	53.15	1.9919		1			1
251	54	2.0185		2			2
251	54.55	2.03572		2			2
251	54.91	2.04699		1			1
251	56.55	2.09832		2			2
251	58.24	2.15121		2			2
251	58.85	2.1703		1			1
251	59.86	2.20191		1			1
251	61.4	2.25011		1			1
251	62.8	2.29393		1			1
251	64.35	2.34244		1			1
251	64.94	2.36091		1			1
251	65.17	2.36811		1			1
251	65.9	2.39096		2			2
251	67.3	2.43477		1			1
251	68.2	2.46294		1			1
251	79.2	2.80722		2			2
251A	107.85	2.84009		2			2
251A	109	2.87919		2			2
251A	114.9	4.10635		2			2
251A	115.6	4.12529		2			2
251A	129.5	4.50153		2			2
251A	130.9	4.53942		2			2
251A	134	4.62333	2				2
251A	144.6	4.91024		2			2
251A	162.8	5.40287		2			2
251A	169.4	5.58151		2			2
251A	170.9	5.62211		2			2
251A	251.7	8.93357		6			6
251A	254.8	9.06142		6			6
251A	308.7	10.2408		6			6
258	144.9	90.7297		6			6
258	148.21	90.9682		6			6
265	1.32	0.0588027	86	2			88
265	1.34	0.0589012	90				90
265	2.3	0.0636294	88	2	2		92
265	2.82	0.0661904	90				90
265	4	0.0720021	85				85
265	5.5	0.0793898	90	2	2		94
265	8.5	0.0941653	90	2	2		94
265	9.1	0.0971204	90	2			92
265	19.9	0.150312	90				90
265	22.1	0.161147	94				94
265	22.4	0.162625	89				89
265	22.4	0.162625	92				92
265	23.1	0.166073	90				90
265	23.9	0.170013	88				88
265	24.4	0.172475	90				90
265	24.6	0.17346	90				90
265	25.75	0.179124	90	2			92
265	26.4	0.182326	95				95
265	26.6	0.183311	90				90
265	26.8	0.184296	83				83
265	27	0.185281	80	2	2		84
265	27.1	0.185773	90				90
265	27.6	0.188236	90	2			92
265	48.3	0.290186	90				90
265	49.5	0.296097	90				90
265	50.6	0.301514	90				90
265	51	0.303484	95				95
265	51.4	0.305454	94				94
265	52.2	0.309394	90				90
265	52.9	0.312842	95				95
265	53.1	0.313827	95	2			97
265	75.8	0.425628	80	2	2		84
265	76.5	0.429076	90	2			92
265	77.2	0.432523	90				90
265	78.23	0.437596	95				95
265	78.9	0.440896	90				90
265	104.5	0.56698	82				82
265	104.82	0.568556	93				93
265	105	0.569443	85	2			87
265	105.9	0.573875	90				90
265	106.2	0.575353	95				95
265	107	0.579293	90				90
265	107.7	0.58274	85				85
265	108.3	0.585696	90				90
265	108.7	0.587666	95				95
265	109	0.589143	90				90
265	109.9	0.593576	75				75
265	110.9	0.598501	65	1			66
265	111.3	0.600471	80				80
265	111.5	0.601456	90				90
265	112.1	0.604411	95				95
265	112.8	0.607859	93				93
265	113.13	0.609484	94				94
265	113.4	0.610814	90				90
265	133.85	0.761181	90				90
265	134.35	0.765888	93				93
265	134.83	0.770406	95				95
265	135.3	0.774831	92				92
265	135.7	0.778597	95		5		100
265	135.78	0.77935	95				95
265	136.3	0.784245	90				90
265	137.3	0.793659	95				95
265	138.1	0.801191	95				95
265	138.6	0.805898	90		5		95
265	162.1	1.02713	85				85
265	162.9	1.03466	87				87
265	163.7	1.04219	88				88
265	164.3	1.04784	93				93
265	164.8	1.05255	80				80
265	165.1	1.05537	80				80
265	165.27	1.05697	90				90
265	165.45	1.05867	75	1			76
265	165.9	1.0629	65				65
265	166.6	1.06949	65				65
265	167.3	1.07608	60				60
265	167.51	1.07806	65				65
265	168.1	1.08361	60				60
265	168.7	1.08926	70				70
265	169.35	1.09538	70				70
265	169.65	1.0982	93				93
265	169.9	1.10056	80				80
265	170.1	1.10244	85				85
265	190.3	1.29261	90				90
265	190.9	1.29825	80				80
265	191.8	1.30673	80				80
265	193.3	1.32085	80				80
265	193.85	1.32603	65				65
265	194.1	1.32838	70				70
265	194.5	1.33214	85				85
265	194.8	1.33497	93				93
265	195.35	1.34015	90				90
265	195.65	1.34297	85				85
265	196.3	1.34909	90				90
265	196.8	1.3538	90				90
265	218.8	1.56091	75				75
265	219.7	1.56938	85				85
265	220.5	1.57691	85				85
265	220.95	1.58115	85				85
265	221.7	1.58821	90				90
265	222.15	1.59244	80				80
265	222.9	1.5995	90				90
265	223.92	1.60911	85				85
265	224.06	1.61042	60				60
265	224.38	1.61344	90				90
265	225	1.61927	95				95
265	225.85	1.62728	95				95
265	226.3	1.63151	95				95
265	226.7	1.63528	95				95
265	227.35	1.6414	70				70
265	227.6	1.64375	93				93
265	247	1.82638	90				90
265	247.34	1.82958	80				80
265	247.8	1.83391	87				87
265	248.1	1.83674	85				85
265	248.7	1.84239	70				70
265	249.3	1.84804	60				60
265	250.05	1.8551	80				80
265	250.8	1.86216	85				85
265	251.45	1.86828	75				75
265	252.55	1.87863	70				70
265	252.75	1.88051	85				85
265	253.8	1.8904	92				92
265	254.1	1.89322	93				93
265	276.4	3.42326	90				90
265	276.6	3.42605	82				82
265	303.6	3.80266	90				90
265	332.01	4.19894	70				70
265	332.06	4.19964	75				75
265	332.12	4.20047	90				90
265	332.54	4.20633	70				70
265	332.7	4.20856	70				70
265	332.85	4.21065	80				80
265	333.05	4.21344	89				89
265	333.4	4.21833	93				93
265	334.3	4.23088	85				85
265	334.9	4.23925	70				70
265	336.1	4.25599	65				65
265	336.22	4.25766	75				75
265	336.29	4.25864	85				85
265	336.36	4.25961	85				85
265	336.49	4.26143	75				75
265	336.6	4.26296	80				80
265	361.6	4.61168	90				90
265	362.7	4.62702	90		1		91
265	363.75	4.64167	90				90
265	364.4	4.65073	90				90
265	366.55	9.48037	90				90
265	368.3	9.4905	90				90
265	369.38	9.49675	85				85
265	369.4	9.49686	90				90
265	398.95	9.66788	5	2			7
265	400.7	9.67801	45				45
265	400.7	9.67801	5				5
265	402.25	9.68698	10				10
265	403.65	9.69508	12				12
265	403.78	9.69583	5	2			7
265	405	9.70289	4	2			6
265	406.75	9.71302	2				2
265	427.65	9.83398	5				5
265	427.72	9.83438	5				5
265	429.8	9.84642	3				3
265	430.2	9.84873	3				3
265	432.6	9.86262	1				1
265	433.75	9.86928	2				2
266	1.24	0.20965	99	2			101
266	1.3	0.211501	90				90
266	1.85	0.228462	96				96
266	2.64	0.252824	99	2			101
266	3.35	0.274719	98	1			99
266	4.45	0.308641	93	1			94
266	4.85	0.320976	99	1			100
266	5.95	0.354898	98	2			100
266	6.1	0.359524	93				93
266	26.4	0.98554	83	1			84
266	26.88	1.00034	99	2			101
266	27.35	1.01484	97	2			99
266	28.65	1.05493	80	3			83
266	28.78	1.05893	95	2			97
266	29.6	1.08422	99	2			101
266	45.4	1.57147	97				97
266	45.6	1.57763	85	2			87
266	64.3	2.15431	99				99
266	65.26	2.18391	98				98
266	66.99	2.23726	99				99
266	69.1	2.30233	99				99
266	83.3	2.74023	95				95
266	84.8	2.78649	80	2			82
266	86.3	2.83275	85				85
266	87.23	2.86143	99				99
266	88	2.88517	80	2			82
266	88.08	2.88764	99				99
266	89.49	2.93112	70	2			72
266	90.27	2.95518	97	1			98
266	90.71	2.96874	99				99
266	91.6	2.99619	99				99
266	102.01	3.31722	85	1			86
266	102.5	3.33233	98	2			100
266	103.75	3.37088	90	2			92
266	104.85	3.4048	99	2			101
266	107.13	3.47511	98	2			100
266	108.3	3.51119	95				95
266	109.25	3.54049	85	2			87
266	110.6	3.58212	99	2			101
266	121.28	3.91147	99				99
266	122.51	3.9494	99	2			101
266	123.6	3.98301	99				99
266	125.47	4.04068	99				99
266	127.13	4.09187	99				99
266	127.6	4.10637	85	2			87
266	130.94	4.20937	95	2			97
266	131.79	4.23558	99				99
266	133	4.27289	98				98
266	135.26	4.34259	97	2			99
266	136.49	4.38052	99				99
266	138.44	4.44065	99	2			101
266	138.6	4.44559	85				85
266	140.2	4.49493	97	1			98
266	140.75	4.51189	99	2			101
266	142.57	4.56801	15	2			17
266	142.82	4.57572	99				99
266	144.88	4.63925	15				15
266	145.1	4.64603	4				4
266	149.42	12.2308	10				10
266	150.85	12.2541	8				8
266	152.43	12.2799	5				5
266	152.55	12.2819	20				20
266	154.52	12.314	5	2			7
266	155.67	12.3328	1				1
266	156.66	12.349	15	2			17
266	157.9	12.3692	60				60
266	159.05	12.388	20	5			25
266	160.81	12.4167	80	2			82
266	161.71	12.4314	92				92
266	163.62	12.4626	89				89
266	165.07	12.4863	85				85
266	165.87	12.4994	75	2			77
266	177.76	12.6935	15	5			20
266	179.65	12.7244	95	1			96
266	180.16	12.7327	2	2			4
266	196	15.574	1				1
266	196.99	15.6068	1				1
266	197.84	15.6349	1				1
266	199.49	15.6895	2				2
266	201.53	15.757	15	1			16
266	203.32	15.8162	20				20
266	204.78	15.8645	2				2
266	205.1	15.8751	20	1			21
266	216.05	16.2374	30	2			32
266	216.32	16.2463	10	2			12
266	216.95	16.2672	20	2			22
266	218.45	16.3168	20	3			23
266	220.63	16.3889	20	2			22
266	221.1	16.4045	30	10			40
266	234.61	16.8514	20	1			21
266	236.56	16.916	5	1			6
266	237.99	16.9633	5	2			7
266	238.6	16.9834	15	1			16
266	238.6	16.9834	2	2			4
266	238.6	16.9834	15	2			17
266	238.6	16.9834	2	1			3
266	244.02	17.1628	15	1			16
266	244.04	17.1634	8	2			10
266	246.26	17.2369	15	1			16
266	246.37	17.2405	2	2			4
266	246.6	17.2481	2	2			4
266	246.6	17.2481	2	2			4
266	246.6	17.2481	2	2			4
266	246.6	17.2481	2	2			4
266	253.97	17.492	2	2			4
266	255	17.526	2	2			4
266	255.96	17.5578	2	2			4
266	256.99	17.5919	2	2			4
266	258.61	17.6455	2				2
266	259.85	17.6865	1				1
266	260.6	17.7113	1				1
266	272.29	18.0981	2	2			4
266	274.74	18.1791	2				2
266	276.3	18.2308	30	1			31
266	276.48	18.2367		2			2
266	276.8	18.2473	1	2			3
266	277.33	18.2648	1	2			3
266	279.15	18.3251	1	2			3
266	279.6	18.3399	3				3
266	291.83	18.7446	2	2			4
266	293.4	18.7965	2	2			4
266	295.91	18.8796	15	0			15
266	295.98	18.8819	15	2			17
266	296.58	18.9017	5	2			7
266	298.57	18.9676	5	2			7
266	299.62	19.0023	2	2			4
266	300.6	19.0348	5	2			7
266	311.32	19.3922	2	2			4
266	312.3	19.4248	1	2			3
266	313.98	19.4808	2	2			4
266	315.3	19.5248	2	2			4
266	315.98	19.5475	15	2			17
266	316.1	19.5515	8	1			9
266	329.73	20.0059	2				2
266	331.34	20.0595	1				1
266	333.54	20.1329	2				2
266	334.3	20.1582	1				1
266	335.74	20.2062	2				2
266	338.6	20.3015	8	2			10
267B	105.4	1.70314	20				20
267B	106.6	1.73066	20				20
267B	134.56	2.37183	30				30
267B	134.67	2.37436	40				40
267B	134.98	2.38146	60				60
267B	135.1	2.38422	24				24
267B	144.18	2.59244	30				30
267B	144.3	2.59519	60				60
267B	144.48	2.59932	40				40
267B	145.27	2.61743	30				30
267B	145.6	2.625	40				40
267B	145.75	2.62844	60				60
267B	146.1	2.63646	20				20
267B	162.5	8.97607	20				20
267B	162.95	9.00451	70				70
267B	164.44	9.09869	70				70
267B	165.96	9.19476	65				65
267B	165.99	9.19666	70				70
267B	182.6	10.2465	20				20
267B	183.3	10.2908	70				70
267B	184.48	10.3654	80				80
267B	185.74	10.445	50				50
267B	188.5	10.6195	24				24
267B	189.66	10.6928	40				40
267B	189.92	10.7092	40				40
267B	190.6	10.7522	60				60
267B	210.7	12.0226	40				40
267B	211.3	12.0606	50				50
267B	215	12.2944	40				40
267B	216.31	12.3772	70				70
267B	218.6	12.4556	60				60
267B	239.25	12.9382	20				20
267B	240.9	12.9768	15				15
267B	242.25	13.0083	40				40
267B	244.2	13.0539	20				20
267B	247.6	13.1333	20				20
267B	268	13.61	15				15
267B	269.05	13.6346	10				10
267B	271.82	13.6993	40				40
267B	273.72	13.7437	20				20
267B	275.98	13.7965	90				90
267B	276.1	13.7993	40				40
274	39.37	2.06938	65				65
274	40.9	2.1119	35		2		37
274	41.65	2.13275	35		2		37
274	42.6	2.15915	24	2			26
274	48.4	2.32034	40	2			42
274	50.64	2.38259	20	2			22
274	52.31	2.429	6				6
274	52.75	2.44123	5				5
274	55	2.50376	55		2		57
274	56.77	2.55295	55				55
274	57.1	2.56212	40	2	2		44
274	57.7	2.5788	50	2			52
274	59.3	2.62326	30	2	2		34
274	60.1	2.6455	20	2			22
274	60.1	2.6455	20	2			22
274	60.1	2.6455	35	2			37
274	60.1	2.6455	35	2			37
274	77.05	3.11656	45	2			47
274	77.87	3.13935	45	2			47
274	79.95	3.19716	35	2			37
274	81.3	3.23468	35		2		37
274	84.14	3.3136	60				60
274	84.9	3.33472	45	2	2		49
274	85.1	3.34028	30	2			32
274	86.56	4.22369	50	2	2		54
274	89.32	4.51898	50	2	2		54
274	91.42	4.74367	35	2	2		39
274	92.01	4.80679	24	2			26
274	93.42	4.95765	35	2	2		39
274	94.6	5.0839	55	2	2		59
274	97.3	5.37277	30	2	2		34
277	84.41	29.7462	7				7
277	85.35	29.7741	5	2	1		8
277	97.47	30.1342	2	2	2		6
277	99.5	30.1945		3			3
277	102.64	30.2878		3			3
277	106.3	30.3965	2	1			3
277	111.1	30.5391		5			5
277	115.6	30.6728	1	2			3
277	115.63	30.6737	2	2			4
277	120.6	30.8214	3	7			10
277	130.1	31.1036	2	2			4
277	132.8	31.1838		7			7
277	138.1	31.3413		3			3
277	140.53	31.426	4	4			8
277	147.6	31.8955		10			10
277	154.6	32.3604	3	2			5
277	181.5	33.7178		1			1
277	191.3	34.1677		2			2
277	207.5	35.9224	2	2			4
277	211.1	36.0839	1	1			2
277	226.33	36.7672	2	2	2		6
277	237.68	37.2764	2	2			4
277	245.05	37.6071	2				2
277	280.6	39.202	2	3			5
277	296.6	39.901	2				2
278	1.35	0.0976911	55	30			85
278	2.45	0.110176	40	45			85
278	4.38	0.132081	60	15			75
278	5.63	0.146268	60	4			64
278	6	0.150467	50	25			75
278	102.87	1.24992	50		2		52
278	103.73	1.25968	35	5			40
278	105.41	1.27875	80				80
278	106.53	1.29146	40	8	2		50
278	108.25	1.31098	50	2			52
278	110.6	1.33765	30	40			70
278	111.77	1.35093	30	25	2		57
278	119.6	1.4398	75	3			78
278	127.6	1.5306	50	2			52
278	129.5	1.55216	70	2			72
278	138.6	1.65544	57		1		58
278	143.35	1.70935	60	2	2		64
278	152.4	1.81207	80	4			84
278	157.6	1.87109	60	10	2		72
278	160.55	1.90457	80				80
278	166.27	1.96949	30	20	5		55
278	167.1	1.97891	25	30			55
278	170.18	9.40987	8	15			23
278	172.21	9.52021	20	12			32
278	176.6	9.75882	25	15			40
278	186.1	10.2752	30	7	2		39
278	195.6	10.7915	25	5			30
278	202.71	11.178	15	5			20
278	205.1	11.3079	10	15			25
278	214.6	11.9672	10	5			15
278	224.1	12.6353	15	10	2		27
278	226.2	12.783	40	30			70
278	230.57	13.0903	35	30			65
278	233.6	13.3034	10	7			17
278	243.1	13.9715	40	16			56
278	245.32	14.1276	10	3			13
278	252.6	14.6396	20	4			24
278	262.1	15.3077	40	3	2		45
278	264.79	15.4968	60	20			80
278	265.13	15.5208	60	8			68
278	267.1	15.6593	25	14			39
278	276.17	16.198	50	20			70
278	280.16	16.4222	60	10			70
278	280.31	16.4306	25	5			30
278	281.1	16.475	40	8	2		50
278	281.1	16.475	30	18	2		50
278	281.1	16.475	40	18	2		60
278	281.1	16.475	30	8	2		40
278	291.1	17.0369	50	8			58
278	294.71	17.2398	40	35			75
278	297.1	17.3741	40	30			70
278	309.6	18.0765	40	10			50
278	319.1	18.6103	70	10			80
278	327.1	18.935	65	15	2		82
278	348.1	23.8223	60	20	5		85
278	357.1	24.68	81	10	3		94
278	367.1	25.633	70	20			90
278	379.6	26.8243	25	5	5		35
278	398	28.5779	10	10			20
278	400.1	28.778	2	2			4
278	412.15	29.9264	2	5			7
278	414.3	36.0354	5	2	2		9
281	20.1	2.43299	5				5
281	20.3	2.45753	1	1	1		3
281	26.1	3.16911	30				30
281	26.6	3.23046		1	1		2
281	40.6	4.97921	1				1
281	54.6	6.85849	1	1	5		7
281	83.1	10.9082			1		1
281	92.6	12.5581			1		1
281	102.1	15.2449			1		1
281	111.6	20.236			1		1
289	3.75	1.04894	2		2		4
289	6.75	1.14097		2	2		4
289	10.25	1.24834		1	2		3
289	10.7	1.26215			1		1
289	14.76	1.3867		2	2		4
289	15.97	1.42382		2	2		4
289	18.6	1.5045		1	2		3
289	20.05	1.54899	2	2	1		5
289	23.05	1.64102		5	2		7
289	26.05	1.73305		1	2		3
289	28.03	1.79379	2	1			3
289	28.4	1.80515			2		2
289	30.92	1.88245	2	1	2		5
289	33.75	1.96927	2	2	2		6
289	37.6	2.08738	2	2	2		6
289	39.2	2.13647		2	1		3
289	41.75	2.21469	2	2	2		6
289	44.62	2.30274	2	1	1		4
289	47.1	2.37882	2	2	1		5
289	48.43	2.41962	2	3	2		7
289	51.25	2.50613		2	2		4
289	52.75	2.55215		1	2		3
289	56.6	2.67026	2	2	2		6
289	57.75	2.70554	2	1	2		5
289	62.25	2.84359		1	2		3
289	66.1	2.9617		2	2		4
289	67.75	3.01232		1	1		2
289	72.25	3.15037		2	2		4
289	76.1	3.26848	2	1	1		4
289	77.12	3.29977		1	2		3
289	81.65	3.43874	2	1	2		5
289	85.5	3.55685	2	1	1		4
289	86.35	3.58293		2	2		4
289	95.75	3.8713	2	2	2		6
289	102.6	4.08144			1		1
289	106.75	4.20876			1		1
289	113.6	4.4189		2	2		4
289	116.25	4.50019		2			2
289	120.1	4.6183	1	2	2		5
289	120.1	4.6183	1	2	2		5
289	120.1	4.6183	1	1	2		4
289	120.1	4.6183	1	1	2		4
289	126.05	4.80084	2	1	2		5
289	132.9	5.01098	2	2	2		6
289	134	5.04473	2	2	2		6
289	139.1	5.19759		2	1		3
289	144.85	5.33913	2	3	1		6
289	151.7	5.50774		1	1		2
289	154.25	5.57051		1			1
289	161.1	5.73912		2	2		4
289	163.75	5.80435	2	3	2		7
289	169.1	5.93604		3			3
289	174.75	6.07512		3	1		4
289	177.1	6.13297		1	2		3
289	182.85	6.2745	2	3	2		7
289	189.7	6.44312		2	2		4
289	193.1	6.52681		1	2		3
289	201.75	6.73973		2			2
289	205.6	6.8345		1			1
289	209.9	6.94034		1	2		3
289	218.1	7.14219		2			2
289	220.75	7.20742		1			1
289	225.38	7.30868		1			1
289	227.6	7.35656		3	2		5
289	230.25	7.41372		1			1
289	237.1	7.56145		2			2
289	238.65	7.59488		1			1
289	247	7.77497		1	2		3
289	248	7.79654		1			1
289	250.75	7.85585		1			1
289	250.76	7.85606		3			3
289	250.76	7.85606		1			1
289	256.1	7.97123	2	2	2		6
289	257.65	8.00466		2	0		2
289	266	8.18475	2	5	2		9
289	266.75	8.20093		2	1		3
289	270.6	8.28396	2	4	2		8
289	277.75	8.48124	1	3	2		6
289	278.28	8.50112		5	1		6
289	280.1	8.56939	2	2	2		6
289	287.25	8.83761		3	1		4
289	294.1	9.09457	2	5	2		9
289	296.75	9.19398	2	3	1		6
289	302.1	9.39467	2	4	2		8
289	304.85	9.49783		2			2
289	313.2	9.59433		2			2
289	314.25	9.60416		1			1
289	321.75	9.67438		3			3
289	322.6	9.68234		2			2
289	326.62	9.71998		1			1
289	329.1	9.74319	2	2	1		5
289	335.05	9.7989		2			2
289	341.9	10.3827	2	2	1		5
289	344.65	10.5928		3			3
289	351.5	11.1161		1	1		2
289	352.75	11.2116		1			1
289	361.1	11.8495		1			1
289	362.25	11.9374		2	0		2
289	370.6	12.0513		1	2		3
289	371.65	12.0638		2			2
289	380	12.1633		3	2		5
289	380.9	12.174	2	2	2		6
289	383.1	12.2002	1	4	1		6
289	392.25	12.3091	2	2	2		6
289	399.1	12.3907	1	5	2		8
289	400.15	12.4032		2	2		4
289	408.5	13.9718		1			1
289	409.55	13.9866		2	2		4
289	417.9	14.1037		3			3
289	419.05	14.1198	2	5			7
289	427.4	14.2369		1			1
289	429.75	14.2698		3			3
289	430.6	14.2818		2			2
289	440.75	14.4241		3			3
289	446.1	14.4991		1			1
289	447.75	14.5223		1			1
289	456.1	14.6394		4	1		5
289	457.15	14.6541		3			3
289	465.5	14.7712	2	2	1		5
289	466.75	14.7887		3			3
289	475.1	14.9058		4	2		6
289	475.9	14.917	1	2	1		4
289	484.1	15.2646		3	1		4
289	485.75	15.339	3	3	1		7
289	494.1	15.7157		3			3
289	496.25	15.8127		2	1		3
289	500.1	15.9864		1			1
289	505.75	16.2413	2	2	2		6
289	509.6	16.415		3			3
289	514.15	16.6203		3	1		4
289	522.5	16.997		20			20
289	524.75	17.0985		10			10
289	528.6	17.2722		3			3
289	532.9	17.4662		2			2
289	541.2	17.8406		3			3
289	542.75	17.9105		1			1
289	551.1	18.191		3			3
289	554.1	18.2751		3			3
289	562.75	18.5179		2			2
289	569.6	18.7101		1			1
289	571.25	18.7564		5			5
289	574.55	18.849		3			3
289	579.6	18.9907		1			1
289	581.75	19.051		3			3
289	582.6	19.0749		3			3
289	589.8	19.2769		1			1
289	592.1	19.3414		1			1
289	601	19.5912		15	2		17
289	603.1	19.6501		1			1
289	610.12	19.8471		2			2
289	612.6	19.9167		1			1
289	618.25	20.0752		2			2
289	622.1	20.1833		1			1
289	628.25	20.3558	2	6			8
289	636.6	20.5902		2			2
289	638.75	20.6505		2			2
289	645.6	20.8427		1			1
289	646.82	20.8769		2			2
289	653.6	21.0672		2	2		4
289	656.75	21.1556		1			1
289	665.1	21.3899		1			1
289	665.75	21.4081		8			8
289	672.6	21.5906		3			3
289	676.75	21.7007		3			3
289	683.6	21.8825		5			5
289	686.25	21.9528		11			11
289	691.6	22.0948		5			5
289	705.25	22.457		2			2
289	709.1	22.5592			1		1
289	713.25	22.6693		11			11
289	714.75	22.7091		20	1		21
289	720.1	22.8511		1	1		2
289	723.6	22.9439		1	0		1
289	733.75	23.2133		15			15
289	736.1	23.2756		1			1
289	742.1	23.4348		10	1		11
289	745.6	23.6568		2	2		4
289	752.8	24.1406		4			4
289	756.6	24.3959		1	1		2
289	763.1	24.8326		1	1		2
289	770.25	25.313		10			10
289	774.1	25.5717		2	1		3
289	780.4	25.9949		10	1		11
289	782.1	26.1092		2	2		4
289	789.6	26.6131		5			5
289	791.6	26.7474		2			2
289	798.75	27.0448		5			5
289	799.6	27.1015		2			2
289	809.75	27.7791		3			3
289	816.6	28.2363		2			2
289	819.25	28.4095		2			2
289	820.1	28.4284		2			2
289	828.75	28.6209		3			3
289	831.1	28.6732		3			3
289	838.26	28.8326		2			2
289	842.1	28.918		2			2
289	846.5	29.016		15			15
289	850.1	29.0961		2			2
289	862.6	29.3742		3			3
289	866.1	29.4521		4			4
289	880.1	29.7637		3			3
289	885.77	29.8899		3			3
289	889.6	29.9751		1			1
289	895.25	30.1008		3			3
289	896.1	30.1198		2			2
289	904.1	30.2978		3			3
289	913.01	30.4961		3			3
289	923.75	30.7351		8			8
289	927.6	30.8208		5			5
289	931.72	30.9125		10			10
289	938.6	31.0656		8			8
289	941.54	31.2796		15			15
289	942.1	31.3461		5			5
289	950.87	32.3875		8			8
289	953.1	32.6523		4			4
289	960.5	33.531		8			8
289	961.1	33.6022		5			5
289	969.8	34.5618		40			40
289	970.6	34.6167		11			11
289	980.1	35.2688		30			30
289	988.1	35.8179	2	30			32
289	1000.03	36.6367		15			15
289	1005.1	36.9847		10			10
289	1009.25	37.2695		15			15
289	1010.1	37.3279		30	1		31
289	1027.6	39.3077		3			3
289	1037.1	40.6384		20			20
289	1049.6	43.4794		10			10
289	1054.6	44.6158		1			1
296	14.23	0.0899331	2	1			3
296	15.6	0.139237		2			2
296	16.21	0.16119	2				2
296	16.25	0.16263		2			2
296	16.33	0.165509		2			2
296	16.38	0.167309	1	7			8
296	41.1	1.05695	2	1			3
296	82.6	2.55047	2				2
296	98.1	3.18391			2		2
296	228.75	11.5787		1			1
296	230.45	11.6018		2			2
296	230.95	11.6086		15			15
296	231.1	11.6107		2			2
296	238.25	11.7079		5			5
296	241.53	11.7525		15			15
296	242.1	11.7602		2			2
296	246.4	11.8187		3			3
296	247.9	11.8391		3			3
296	248.6	11.8486		2			2
296	254.75	11.9323		5			5
296	255.56	11.9433		1			1
296	255.82	11.9468		15			15
296	260.05	12.0043		7			7
296	261.1	12.0186		10			10
296	263.75	15.7476		10			10
296	266.2	16.0048		7			7
296	266.75	16.0626		5			5
296	268.4	16.2358		7			7
296	271.25	16.535		3			3
296	272.1	16.6242		20			20
296	277.4	17.1806		7			7
296	277.75	17.2173		20			20
296	280.1	17.464		15			15
296	282.8	17.7474		5			5
296	287.3	18.2198		5			5
296	288.16	18.3101		5			5
296	289.6	18.4613		7			7
296	294.2	18.9442		2			2
296	299.1	19.4585		2			2
296	307.1	20.2983		1			1
296	318.1	21.4531		3			3
296	321	21.7575		2			2
296	327.6	22.4503		5			5
296	331.9	22.9017		2			2
296	338.6	23.6051		3			3
296	340.4	23.794		2			2
296	342.8	24.046		2			2
296	350.8	24.7833		1			1
296	364.1	25.0929		2			2
296	372.65	25.292		1			1
296	387.15	25.6296		2			2
296	429.55	26.6167		1			1
296	548.71	29.3911		1			1
299	0.02	0.244374	1		2		3
299	0.16	0.245919	2	1			3
299	0.25	0.246912	2	2			4
299	9.1	0.344548		3	2		5
299	15	0.409639		2			2
299	17.1	0.432807			2		2
299	25.1	0.521065			1		1
299	33.45	0.613185	40	2			42
299	39.82	0.683461	2	2			4
299	58.87	0.893627			2		2
299	61.15	0.91878	20	3			23
299	61.31	0.920546	7		1		8
299	90.17	1.23894		2			2
299	108.18	1.43763	10				10
299	112.1	1.48088	2	2			4
299	119.32	1.56053		2			2
299	128.75	1.66457	2	1			3
299	137.65	1.76275	10	1			11
299	144.4	1.83722	5	2			7
299	147.75	1.87418	15	5			20
299	157.01	1.97634	15	10			25
299	167.06	2.08721	2	1			3
299	176.33	2.18948	2	1			3
299	181.37	2.24509	1	1			2
299	209.6	2.55653	3	15			18
299	219.35	2.66409	1	15			16
299	229.07	12.2282	10	25			35
299	238.5	12.409	10	20			30
299	238.62	12.4113	15	10			25
299	256.6	12.7559	2	2			4
299	295.55	13.5025	1	2			3
299	323.27	14.0338	5	40			45
299	324.4	14.0555	2	1			3
299	354.6	14.6343	2	1			3
299	438.4	16.2406		2			2
299	478.1	17.0015	1	3			4
305	410.1	104.088		4			4
305	428.6	106.143		2			2
305	551.9	123.127	2				2
305	552	123.147		4			4
305	561.47	125.072		32			32
305	579.1	128.654		23			23
305	579.1	128.654		23			23
305	589.9	130.849		31			31
305	590.1	130.89		31			31
305	608	134.527		39			39
317B	1.61	0.274035		6			6
317B	9.2	1.67404		6			6
317B	22.78	3.46864		4			4
317B	46.75	4.58947		6			6
317B	76.75	6.90859		6			6
317B	83.2	7.53414		6			6
317B	83.2	7.53414		1			1
317B	87.7	7.95806		4			4
317B	95.5	8.50692		2			2
317B	103.75	9.08743		6			6
317B	108.25	9.40408		6			6
317B	112.25	9.68554		4			4
317B	116.75	10.158		6			6
317B	122.75	10.8921		4			4
317B	139.8	12.4727		1			1
317B	140.55	12.5191		4			4
317B	146.43	12.8833		6			6
317B	149.9	13.3075		6			6
317B	162.25	15.0854		6			6
317B	163.9	15.3229		6			6
317B	167	15.7692		23			23
317B	170.7	16.3018		55	6		61
317B	171.75	16.453		6	1		7
317B	176.25	16.9712		15	4		19
317B	184.25	17.6871		6			6
317B	187.1	17.9422		6	2		8
317B	198.72	19.0189		6			6
317B	207.25	19.8854		6			6
317B	212.35	20.4035		75			75
317B	215.4	20.7134		6			6
317B	220.79	21.261		6			6
317B	230.25	22.222		6	2		8
317B	235.25	22.73			2		2
336	183.55	27.8856	2	8			10
336	199.25	30.7154	5	20			25
336	200.83	30.7691	1	2			3
336	201.6	30.7952		1			1
336	204.6	30.8972		3			3
336	208.15	31.0178	0	1			1
336	209.6	31.067	3	3			6
336	218.6	31.3728	1	2			3
336	225.53	32.2473		10			10
336	273	37.8011	5	5			10
338	68.1	3.45472	10	48			58
338	79.6	11.5252	10	10			20
338	82.1	11.6058	5	35			40
338	87.1	11.7672	35	15			50
338	96.28	12.0634	30	5			35
338	96.99	12.0863	5	70			75
338	96.99	12.0863	5	5			10
338	96.99	12.0863	10	70			80
338	96.99	12.0863	10	5			15
338	97.54	12.1041	30	10			40
338	97.78	12.1118	50	90			140
338	97.78	12.1118	50	20			70
338	97.78	12.1118	3	90			93
338	97.78	12.1118	3	20			23
338	110.34	17.8068	50	15			65
338	118.4	18.0659	50	20			70
338	137.4	18.6766	60	20			80
338	137.47	18.6788	12	12			24
338	147.53	19.0022	15	15			30
338	148.4	19.0301	30	20			50
338	158.85	19.366	60	20			80
338	165.51	19.5801	40	2			42
338	173.64	19.8414		25			25
338	184.22	20.1814	80	3			83
338	185.8	32.2177	10	5			15
338	187.83	32.4931	73	10			83
338	191.23	32.9543	18	5			23
338	193.55	33.269	3				3
338	197.6	33.8184	15	15			30
338	200.38	34.1955	80	10			90
338	201.95	34.4085	60	5			65
338	215.88	36.2981	4	3			7
338	218.1	36.5993	2	3			5
338	220.9	36.9791	55				55
338	223	37.264	10	10			20
338	235.2	38.9189	2	50			52
338	251.6	41.1436	5	30			35
338	254.6	41.5506	78				78
338	264.1	42.8393	10	15			25
338	269.1	43.5175	9	9			18
338	306	48.5231		5			5
354	0.76	0.00893964	5				5
354	1.19	0.019029	3				3
354	3.1	0.0638445	5				5
354	93.35	2.18144	2				2
354	95.11	2.21864	5				5
354	141.06	3.05926	2				2
354	141.66	3.07024	5				5
354	148.1	5.73536	2				2
354	148.9	5.74449	5				5
354	188.1	6.19186	2				2
354	190.05	6.21411	2				2
354	190.4	6.21811	5				5
354	236.42	6.7433	5				5
354	236.85	6.74821	5				5
354	238.3	6.76476	2				2
354	239.6	14.8119	10				10
354	284.98	17.8589	2				2
354	286.81	17.9818	10				10
354	288.35	18.0852	10				10
354	398.6	24.5928	10				10
354	456.1	26.7867	5				5
354	463.1	27.0595	2				2
354	523	30.0734	5				5
354	525.7	30.2093	5				5
354	526.45	30.2366	5				5
354	606.5	32.2593	35	5			40
354	606.52	32.2598	30	5			35
354	607.9	32.2947	35				35
354	608.6	32.3124	35				35
354	610.63	32.3637	30	5			35
354	612.81	34.6654	40				40
354	614.9	34.7031	30				30
354	692.98	36.1134	5				5
354	698.5	36.2131	5				5
354	703.5	48.4732	5				5
354	705.77	48.6197	5				5
354	817.9	55.8571	2				2
356	59.5	23.4559	2	2			4
356	85.96	24.2071	5	15			20
356	86.9	24.2338		5			5
356	94.15	24.4396		10			10
356	114.8	25.0258	10	15			25
356	116.84	44.1965	15	15			30
356	119.5	44.2816	15	20			35
356	134	44.7455	15	15			30
356	138.6	44.8926	10	15			25
356	164.05	45.7068	15	25			40
356	191.99	46.6006	10	10			20
356	192.93	46.6307	10	15			25
356	223.73	47.7688	10				10
356	223.73	47.7688	10				10
356	223.86	47.7741	5				5
356	237.95	48.3411		15			15
356	239.32	48.3963	4				4
356	249	48.7863	5				5
356	276.69	49.9019	10				10
356	354.5	61.0029	2				2
356	355.71	61.0361	2	2			4
356	363.55	61.4551	5				5
356	366.14	61.6276	5	15			20
356	366.2	61.6316	5	5			10
356	366.22	61.6329		2			2
356	372.95	62.0813		10			10
356	374.5	62.1845		10			10
356	382.85	62.7407		10			10
356	386.65	62.9939		10			10
356	393.5	63.5706		10			10
356	397.95	64.0185		10			10
356	402.75	64.5016		10			10
356	404.7	64.7216		8			8
356	407.5	65.1642		10			10
356	408.85	65.3777		5			5
356	411.7	65.8255		15			15
356	415.25	66.091		10			10
356	439.65	67.9159		5			5
357	786.9	91.4245		1			1
362	42.43	1.85185	1	1			2
362	45.43	1.90638	20	3	2		25
362	45.43	1.90638	20	3	1		24
362	46	1.91674	10	2			12
362	46.5	1.92582	15	1			16
362	47.8	1.94945	17	1			18
362	48.1	1.95491	8				8
362	48.6	1.96399	6	1			7
362	49.7	1.98399	10				10
362	51.73	2.02088	20	1			21
362	53.1	2.04579	15	1			16
362	54.6	2.07305	15	1	1		17
362	55.2	2.08395	6				6
362	55.4	2.08759	20	3			23
362	58.6	2.14575	20	2			22
362	60.5	2.18029	17	5			22
362	62.6	2.21846	25	4			29
362	62.8	2.22209	8	4			12
362	64.3	2.24936	15	1			16
362	65.1	2.2639	40	1	1		42
362	73.9	2.42384	4	1			5
362	83.4	2.59651	35				35
362	83.94	2.60633	28	1			29
362	84.4	2.61469	18				18
362	87.5	2.67104	25	5	1		31
362	91.4	2.74192	15	5			20
362	92.9	2.76919	5	2			7
362	93.4	2.77827	4	2			6
362	94.9	2.80554	13	4			17
362	97	2.84371	12	5			17
362	98	2.86188	7	5			12
362	99.8	2.8946	17	5			22
362	100.6	2.90914		5			5
362	102	2.93459	20				20
362	102.4	2.94186	5	1			6
362	106.2	3.01093	13				13
362	109.2	3.06545	25	5			30
362	110.7	3.09272	13				13
362	112.1	3.11816	8	2	1		11
362	112.1	3.11816	8	2	1		11
362	112.1	3.11816	8	2	1		11
362	112.1	3.11816	8	2	1		11
362	122	3.2981	10	4			14
362	124.1	3.33627	12				12
362	125.64	3.36426	10	2			12
362	127.7	3.40171	13	3			16
362	128.52	3.41661	5				5
362	130.9	3.45987	1	1			2
362	131.45	3.46987	6	1			7
362	134.25	3.52076	1	2			3
362	135.75	3.54802	5				5
362	137.25	3.57529	6				6
362	140.05	3.62618	5	2			7
362	140.45	3.63345	18	1			19
362	140.9	3.64163	10	3			13
362	142.4	3.66889	9				9
362	145	3.71615		1			1
362	149.9	3.80521	2	1			3
362	150.4	3.8143	2				2
362	151.9	3.84156	1				1
362	156.4	3.92335		2			2
362	156.8	3.93063	8	3			11
362	157.6	3.94517	6				6
362	159	3.97061	18	1			19
362	159.4	3.97788	25	1			26
362	163.78	4.05749	10	2			12
362	163.85	4.05877	15	4			19
362	167.25	4.12056	12	4			16
362	169.05	4.15328	1	1			2
362	182	4.38866	12	3			15
362	183.7	4.41956	8	3			11
362	186.9	4.47772	3				3
362	202.9	4.76853	1	2			3
362	206.7	4.8376	2				2
362	226	5.1884	3	1	1		5
362	235.95	5.36925	12	2			14
362	236.35	5.37652	12				12
362	240.25	5.4474	10	2			12
362	244.75	5.52919	1	2			3
362	244.95	5.53283	1	1			2
362	260.22	5.81038	7	1			8
362	260.25	5.81092	5				5
362	261.1	5.82637	1	3			4
362	261.31	5.83019	2				2
362	263.83	5.87599	2	2			4
362	263.87	5.87672	2				2
362	264	5.87908	1	1			2
362	274.15	6.06357	1	2			3
362	274.55	6.07084	1				1
362	279.65	6.16353	2				2
362	282.6	6.21715		2			2
362	283.05	6.22533		1			1
362	293.75	6.41981	3				3
362	296.75	6.47434	1	1			2
362	301.05	6.5525	2	2			4
362	302.05	6.57067		1			1
362	316.22	6.82822		1			1
362	317.6	6.85331		1			1
362	332.36	7.12158	1				1
362	333.3	7.13867	1	1			2
362	334.1	7.15321	1	1			2
362	339.2	7.24591	8	4	2		14
362	339.3	7.24772			2		2
362	339.6	7.25318	15	5	1		21
362	350.15	7.44493	8	1	2		11
362	353.15	7.49946	4	4			8
362	358.95	7.60488	1	1			2
362	369.2	7.79118	6				6
362	372.2	7.84571	4				4
362	376.7	7.9275	6	3			9
362	378	7.95113	5	1	1		7
362	388.25	8.13743		3			3
362	391.25	8.19196	3	3			6
362	397.05	8.29738	2	1			3
362	407	8.47823	3	2			5
362	409.85	8.53003	5	2			7
362	412.8	8.58365		1			1
362	426.05	8.82448	2				2
362	502.35	11.1349		1			1
362	502.89	11.1566		1			1
366	367.4	32.527		23			23
366	375.4	33.1346		6			6
366	380.7	33.5371		6			6
366	381.85	33.6244	6	6			12
366	384.6	33.8333		16	4		20
366	386	33.9396		6			6
366	388.22	34.1082	15	6			21
366	389.03	34.1697	6	6			12
366	390.7	34.2965	6	6			12
366	391.9	34.3877	23	6			29
366	392.6	34.4408	23	23			46
366	396.65	34.7484	6	6			12
366	399.72	34.9815	6	6			12
366	400.03	35.0051	23	6	6		35
366	400.6	35.0484	6	6			12
366	404.6	35.3522	23	6			29
366	409.15	35.6977	6	6			12
366	410.1	35.7698	6	6			12
366	413.7	36.0432	6	6			12
366	417.15	36.3053	6	6			12
366	420.05	36.5255	6	6			12
366	422.6	36.7192	6	6			12
366	423.5	36.7875	6	6			12
366	424.6	36.871	23	6	2		31
366	434.17	37.5978	6	6	6		18
366	434.7	37.6381	6	6			12
366	437.6	37.8269	6	6			12
366	438.6	37.8917	23	23			46
366	445.8	38.3587	6	6			12
366	446.6	38.4105	6	6			12
366	452.5	38.7932	6	6			12
366	455.45	38.9845	6	6			12
366	458.35	39.1726	2	6			8
366	461.3	39.3639	6	6			12
366	462.2	39.4222	6	6			12
366	462.85	39.4644	6	6			12
366	464.1	39.5455	6	6			12
366	472.5	40.0902	6	6			12
366	475.1	40.2588	6	6			12
366	480.28	40.5948		6			6
366	588.4	49.693		6			6
366A	11.5	0.741445	1	4	4		9
366A	19	1.32068	4	4			8
366A	19.3	1.34385	3	3			6
366A	24.01	1.70761	11	3			14
366A	34.2	2.46251	6	6			12
366A	62.9	3.90783	4	4			8
366A	72.1	4.50692	6	6			12
366A	83.6	5.28482	6				6
366A	109.5	7.03679		6			6
366A	109.72	7.05168		6			6
366A	129.5	10.7514	4	4			8
366A	132.2	12.0054		6			6
366A	138.5	12.9181		4			4
366A	139	12.9806		4			4
366A	143.4	13.5293		6			6
366A	146.21	13.8797		6			6
366A	146.27	13.8872		4			4
366A	146.33	13.8947		6			6
366A	146.6	13.9284	4	4			8
366A	158.1	15.8422		4			4
366A	167.1	16.5841		6			6
[truncated: 12,401 more rows]

## Sheet: Source age models
site	Source		References:
62	NSB		NSB: Neptune Database; http://www. nsb-mfn-berlin.de
62A	NSB		Janus: Janus Database; http://www-odp.tamu.edu/database/
63	NSB		Fleming, R. F., Barron, J. A., 1996. Evidence of Pliocene Nothofagus in Antarctica from Pliocene marine sedimentary deposits (DSDP Site 274). Marine Micropaleontology, 27: 227-236.
64	NSB		Hess, J., Stott, L. D., Bender, M. L., Kennett, J. P., Schilling, J.-G., 1989. The Oligocene marine microfossil record: age assessments using strontium isotopes. Paleoceanography, 4(6), 655-679.
64A	NSB		Lazarus, D. B., Bittniok, B., Diester-Haass, L., Meyers, P., Billups, K., 2006. Comparison of radiolarian and sedimentologic paleoproductivity proxies in the latest Miocene-Recent Benguella Upwelling System. Marine Micropaleontology, 60: 269-294.
125	NSB		Liu, Z., Pagani, M., Zinniker, D., DeConto, R., Huber, M., Brinkhuis, H., Shah, S. R:, Leckie, M., Pearson, A., 2009. Global cooling during the Eocene-Oligocene Climate Transition. Science, 323: 1187-1190.
132	NSB		Pagani, M., Huber, M., Liu, Z., Bohaty, S. M., Henderiks, J., Sijp, W., Krishnan, S., DeConto, R. M.,2011. The role of carbon dioxide during the onset of Antarctic Glaciation. Science, 334: 1261-1264.
137	NSB		Schumacher, S., Lazarus, D. B., 2004. Regional differences in pelagic productivity in the late Eocene to early Oligocene - a comparison of southern high latitudes and lower latitudes. Palaeogeography, Palaeoclimatology, Palaeoecology, 214: 243-263.
139	Janus		Zachos, J. C., Rea, D. K., Seto, K., Nomura, R., Nitsuma, N., 1992. Paleogene and early Neogene Deep Water paleoceanography of the Indian Ocean as determined from benthic foraminifer stable carbon and oxygen iotope records. Geophysical Monograph, 70: 351-385.
142	Janus
144A	Janus		'Initial Reports' refers to:
144B	Janus		Shipboard Scientific Party, 2000. Site 1143. In P. Wang et al. (Eds), Proceeding of the Ocean Drilling Program, Initial Reports, College Station, TX (Ocean Drilling Program), 184: 103pp.
158	NSB		Shipboard Scientific Party, 2000. Site 1144. In P. Wang et al. (Eds), Proceeding of the Ocean Drilling Program, Initial Reports, College Station, TX (Ocean Drilling Program), 184: 97pp.
167	NSB		Shipboard Scientific Party, 2000. Site 1145. In P. Wang et al. (Eds), Proceeding of the Ocean Drilling Program, Initial Reports, College Station, TX (Ocean Drilling Program), 184: 63pp.
170	NSB		Shipboard Scientific Party, 2000. Site 1146. In P. Wang et al. (Eds), Proceeding of the Ocean Drilling Program, Initial Reports, College Station, TX (Ocean Drilling Program), 184: 101pp.
171	NSB		Shipboard Scientific Party, 2000. Site 1148. In P. Wang et al. (Eds), Proceeding of the Ocean Drilling Program, Initial Reports, College Station, TX (Ocean Drilling Program), 184: 121pp.
173	NSB		Shipboard Scientific Party, 2000. Site 1150. In I. S. Sacks et al. (Eds), Proceeding of the Ocean Drilling Program, Initial Reports, College Station, TX (Ocean Drilling Program), 186: 209pp.
178	NSB		Shipboard Scientific Party, 2000. Site 1151. In I. S. Sacks et al. (Eds), Proceeding of the Ocean Drilling Program, Initial Reports, College Station, TX (Ocean Drilling Program), 186: 125pp.
192	NSB		Shipboard Scientific Party, 2001. Site 1165. In P. E. O Brien et al. (Eds), Proceeding of the Ocean Drilling Program, Initial Reports, College Station, TX (Ocean Drilling Program), 188: 191pp.
213	NSB		Shipboard Scientific Party, 2001. Site 1170. In N. F. Exon et al. (Eds), Proceeding of the Ocean Drilling Program, Initial Reports, College Station, TX (Ocean Drilling Program), 189: 167pp.
216	NSB		Shipboard Scientific Party, 2001. Site 1171. In N. F. Exon et al. (Eds), Proceeding of the Ocean Drilling Program, Initial Reports, College Station, TX (Ocean Drilling Program), 189: 176pp.
217	NSB		Shipboard Scientific Party, 2001. Site 1172. In N. F. Exon et al. (Eds), Proceeding of the Ocean Drilling Program, Initial Reports, College Station, TX (Ocean Drilling Program), 189: 149pp.
219	Janus		Shipboard Scientific Party, 2001. Site 1179. In T. Kanagawa et al. (Eds), Proceeding of the Ocean Drilling Program, Initial Reports, College Station, TX (Ocean Drilling Program), 191: 159pp.
223	Janus		Shipboard Scientific Party, 2002. Site 1221. In M. Lyle et al. (Eds), Proceeding of the Ocean Drilling Program, Initial Reports, College Station, TX (Ocean Drilling Program), 199: 66pp.
224	Janus		Shipboard Scientific Party, 2002. Site 1222. In M. Lyle et al. (Eds), Proceeding of the Ocean Drilling Program, Initial Reports, College Station, TX (Ocean Drilling Program), 199: 57pp.
233	NSB		Shipboard Scientific Party, 2003. Site 1225. In S. L. D'Hondt et al. (Eds), Proceeding of the Ocean Drilling Program, Initial Reports, College Station, TX (Ocean Drilling Program), 201: 86pp.
233A	NSB		Shipboard Scientific Party, 2003. Site 1233. In A. C. Mix et al. (Eds), Proceeding of the Ocean Drilling Program, Initial Reports, College Station, TX (Ocean Drilling Program), 202: 76pp.
236	NSB		Shipboard Scientific Party, 2003. Site 1236. In A. C. Mix et al. (Eds), Proceeding of the Ocean Drilling Program, Initial Reports, College Station, TX (Ocean Drilling Program), 202: 74pp.
237	Zachos et al 1992		Shipboard Scientific Party, 2003. Site 1237. In A. C. Mix et al. (Eds), Proceeding of the Ocean Drilling Program, Initial Reports, College Station, TX (Ocean Drilling Program), 202: 107pp.
238	NSB		Shipboard Scientific Party, 2003. Site 1238. In A. C. Mix et al. (Eds), Proceeding of the Ocean Drilling Program, Initial Reports, College Station, TX (Ocean Drilling Program), 202: 101pp.
251	Janus		Shipboard Scientific Party, 2003. Site 1239. In A. C. Mix et al. (Eds), Proceeding of the Ocean Drilling Program, Initial Reports, College Station, TX (Ocean Drilling Program), 202: 93pp.
251A	Janus		Shipboard Scientific Party, 2003. Site 1240. In A. C. Mix et al. (Eds), Proceeding of the Ocean Drilling Program, Initial Reports, College Station, TX (Ocean Drilling Program), 202: 82pp.
258	NSB		Shipboard Scientific Party, 2003. Site 1241. In A. C. Mix et al. (Eds), Proceeding of the Ocean Drilling Program, Initial Reports, College Station, TX (Ocean Drilling Program), 202: 101pp.
265	NSB		Shipboard Scientific Party, 2003. Site 1242. In A. C. Mix et al. (Eds), Proceeding of the Ocean Drilling Program, Initial Reports, College Station, TX (Ocean Drilling Program), 202: 74pp.
266	NSB		Shipboard Scientific Party, 2003. Site 1245. In A. M. Tréhu et al.(Eds), Proceeding of the Ocean Drilling Program, Initial Reports, College Station, TX (Ocean Drilling Program), 204: 131pp.
267B	NSB		Shipboard Scientific Party, 2003. Site 1251. In A. M. Tréhu et al.(Eds), Proceeding of the Ocean Drilling Program, Initial Reports, College Station, TX (Ocean Drilling Program), 204: 119pp.
274	Fleming & Barron 1996		Shipboard Scientific Party, 2004. Site 1259. In J. Erbacher et al. (Eds), Proceeding of the Ocean Drilling Program, Initial Reports, College Station, TX (Ocean Drilling Program), 207: 110pp.
277	Pagani et al 2011
277	Liu et al 2009
278	NSB
281	NSB
289	NSB
296	NSB
299	NSB
305	NSB
317B	NSB
336	Liu et al 2009
338	NSB
354	NSB
356	NSB
357	NSB
362	NSB
366	NSB
366A	NSB
367	NSB
369A	NSB
386	NSB
390A	NSB
398D	NSB
406	NSB
407	NSB
408	NSB
410	NSB
433A	NSB
436	NSB
438A	NSB
440B	NSB
445	NSB
448	NSB
458	NSB
459B	NSB
462	NSB
463	NSB
469	NSB
470	NSB
470A	NSB
472	NSB
493	NSB
495	NSB
499	NSB
503A	NSB
503B	NSB
511	Schumacher & Lazarus 2004
511	NSB
513A	NSB
514	NSB
516	Hess et al 1989
517	NSB
519	NSB
522	NSB
524	NSB
525A	NSB
525B	NSB
532	Lazarus et al 2006
534A	NSB
538A	NSB
540	NSB
545	NSB
547A	NSB
548	NSB
548A	NSB
549A	NSB
552	NSB
552A	NSB
558	NSB
572A	NSB
572C	NSB
572D	NSB
573	NSB
573A	NSB
573B	NSB
574	NSB
574A	NSB
574C	NSB
577	NSB
578	NSB
579A	NSB
581	NSB
584	Scientific Reports (magn)
585	NSB
585A	NSB
586B	NSB
588C	NSB
590B	NSB
591	NSB
592	NSB
593	NSB
594	NSB
594A	NSB
603	NSB
603C	NSB
605	NSB
606	NSB
607	NSB
607A	NSB
608	NSB
608A	NSB
609	NSB
609A	NSB
609B	NSB
610	NSB
610A	NSB
612	NSB
628A	Janus
642B	Janus
642C	Janus
643A	Janus
644A	Janus
645B	Janus
645E	Janus
646A	NSB
646B	NSB
647A	NSB
657A	Janus
657B	Janus
658A	Janus
659A	NSB
660A	Janus
661A	Janus
662A	NSB
663A	Janus
664B	Janus
664D	NSB
665A	Janus
666A	Janus
667A	Janus
677A	Janus
677B	Janus
689B	NSB
689D	NSB
690B	NSB
690C	NSB
690C	Janus
693A	NSB
693B	Janus
694B	Janus
695A	Janus
696A	Janus
696B	Janus
698A	Janus
699A	NSB
700B	NSB
701A	Janus
701B	Janus
701C	Janus
702A	Janus
702B	Janus
703A	NSB
704A	Janus
704B	Initial Reports
704B	NSB
706A	Janus
707A	NSB
707C	NSB
708A	Janus
709A	NSB
709B	NSB
709C	NSB
710A	NSB
710B	NSB
711A	NSB
712A	Janus
713A	NSB
714A	NSB
715A	Janus
717C	Janus
718C	Janus
719A	Janus
720A	Janus
721A	NSB
721B	NSB
722A	NSB
722B	NSB
723A	Janus
724B	NSB
724C	Janus
725C	Janus
726A	Janus
727A	Janus
728A	NSB
730A	Janus
731A	NSB
736A	NSB
736C	Janus
737A	NSB
737B	Janus
738B	NSB
738C	NSB
744A	NSB
744B	Janus
745B	NSB
746A	NSB
747A	NSB
747B	Janus
747C	NSB
748A	NSB
748B	NSB
748C	NSB
749B	NSB
751A	NSB
752A	Janus
752B	Janus
753A	Janus
754A	Janus
754B	Janus
755A	Janus
756B	Janus
756C	Janus
757B	Janus
758A	Janus
761B	Janus
762B	NSB
762C	NSB
763B	NSB
765C	NSB
766A	NSB
767B	Janus
768B	Janus
768C	Janus
769B	Janus
770B	Janus
771A	Janus
782A	Janus
786A	NSB
787B	Janus
790C	Janus
791B	Janus
792A	Janus
792B	Janus
792E	Janus
793A	Janus
793B	Janus
794A	NSB
794B	Janus
795A	NSB
795B	Janus
796B	Janus
797B	NSB
798B	Janus
799A	Janus
800A	NSB
801B	NSB
1088B	NSB
1088C	NSB
1126D	Janus
1128B	Janus
1128C	Janus
1130B	Janus
1131A	Janus
1138A	NSB
1143A	Initial Reports
1143B	Initial Reports
1143C	Initial Reports
1144A	Initial Reports
1144B	Initial Reports
1144C	Initial Reports
1145A	Initial Reports
1145B	Initial Reports
1146A	Initial Reports
1146B	Initial Reports
1146C	Initial Reports
1148A	Initial Reports
1148B	Initial Reports
1150A	Initial Reports
1150B	Initial Reports
1151A	Initial Reports
1151C	Initial Reports
1151D	Initial Reports
1165B	Initial Reports
1168A	NSB
1170A	NSB
1170A	Initial Reports
1171A	Initial Reports
1171B	Initial Reports
1171C	Initial Reports
1171D	Initial Reports
1172A	NSB
1172A	Initial Reports
1173A	Janus
1174B	Janus
1175A	Janus
1176A	Janus
1177A	Janus
1178A	Janus
1178B	Janus
1179B	Initial Reports
1179C	NSB
1207A	NSB
1207B	NSB
1208A	NSB
1209A	NSB
1210A	NSB
1211A	NSB
1212A	NSB
1212B	NSB
1213A	NSB
1213B	NSB
1214A	NSB
1218A	NSB
1218B	NSB
1218C	NSB
1219A	NSB
1219B	NSB
1220A	NSB
1220B	NSB
1220C	NSB
1221A	Initial Reports
1221B	Initial Reports
1221C	Initial Reports
1222A	Initial Reports
1222B	Initial Reports
1225A	Initial Reports
1225B	Initial Reports
1225C	Initial Reports
1233B	Initial Reports
1233C	Initial Reports
1233D	Initial Reports
1233E	Initial Reports
1236A	Initial Reports
1237B	Initial Reports
1238A	Initial Reports
1238B	Initial Reports
1239A	Initial Reports
1239B	Initial Reports
1240A	Initial Reports
1241A	Initial Reports
1242A	Initial Reports
1245B	Initial Reports
1245E	Initial Reports
1251B	Initial Reports
1258A	NSB
1258B	NSB
1259A	Initial Reports
1260A	NSB
1260B	NSB
1262A	NSB
1313A	NSB
1313B	NSB
1313C	NSB
1314A	NSB
1314B	NSB
1314C	NSB
