# Supplementary material for: Quantifying the Cenozoic marine diatom deposition history: links to the C and Si cycles
Source: Copernicus journal article supplement (doi:10.5194/bg-13-6003-2016), 2016-11-02
Supplement: Supplementary file [file bg-13-6003-2016-supplement-title-page.pdf › bg-13-6003-2016-supplement-title-page.pdf]

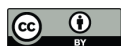

## *Supplement of*

# **Quantifying the Cenozoic marine diatom deposition history: links to the C and Si cycles**

**Johan Renaudie**

*Correspondence to:* Johan Renaudie (johan.renaudie@mfn-berlin.de)

- bg-13-6003-2016-supplement-title-page.pdf
- Supplementary Files
  - Renaudie - Quantifying the Cenozoic marine diatom deposition history - Supplementary Figure 2.pdf
  - Renaudie - Quantifying the Cenozoic marine diatom deposition history - Supplementary File 1.xls

The copyright of individual parts of the supplement might differ from the CC-BY 3.0 licence.
