# Supplementary figures and images for: Quantifying the Cenozoic marine diatom deposition history: links to the C and Si cycles
Source: Copernicus journal article supplement (doi:10.5194/bg-13-6003-2016), 2016-11-02

DSDP 49-408

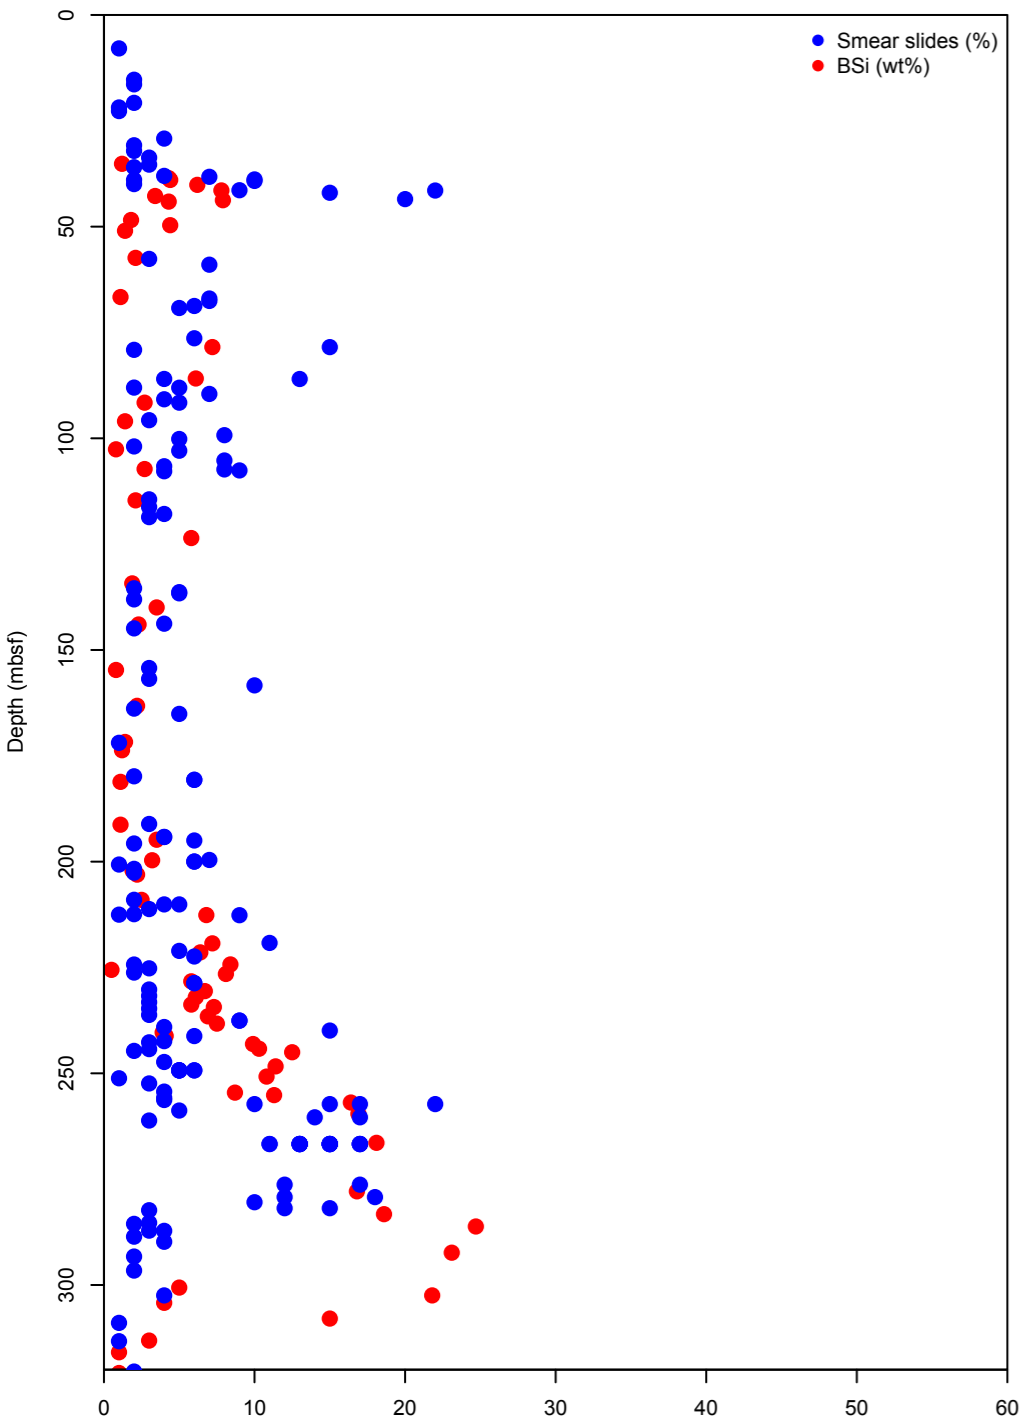

ODP 119-744A

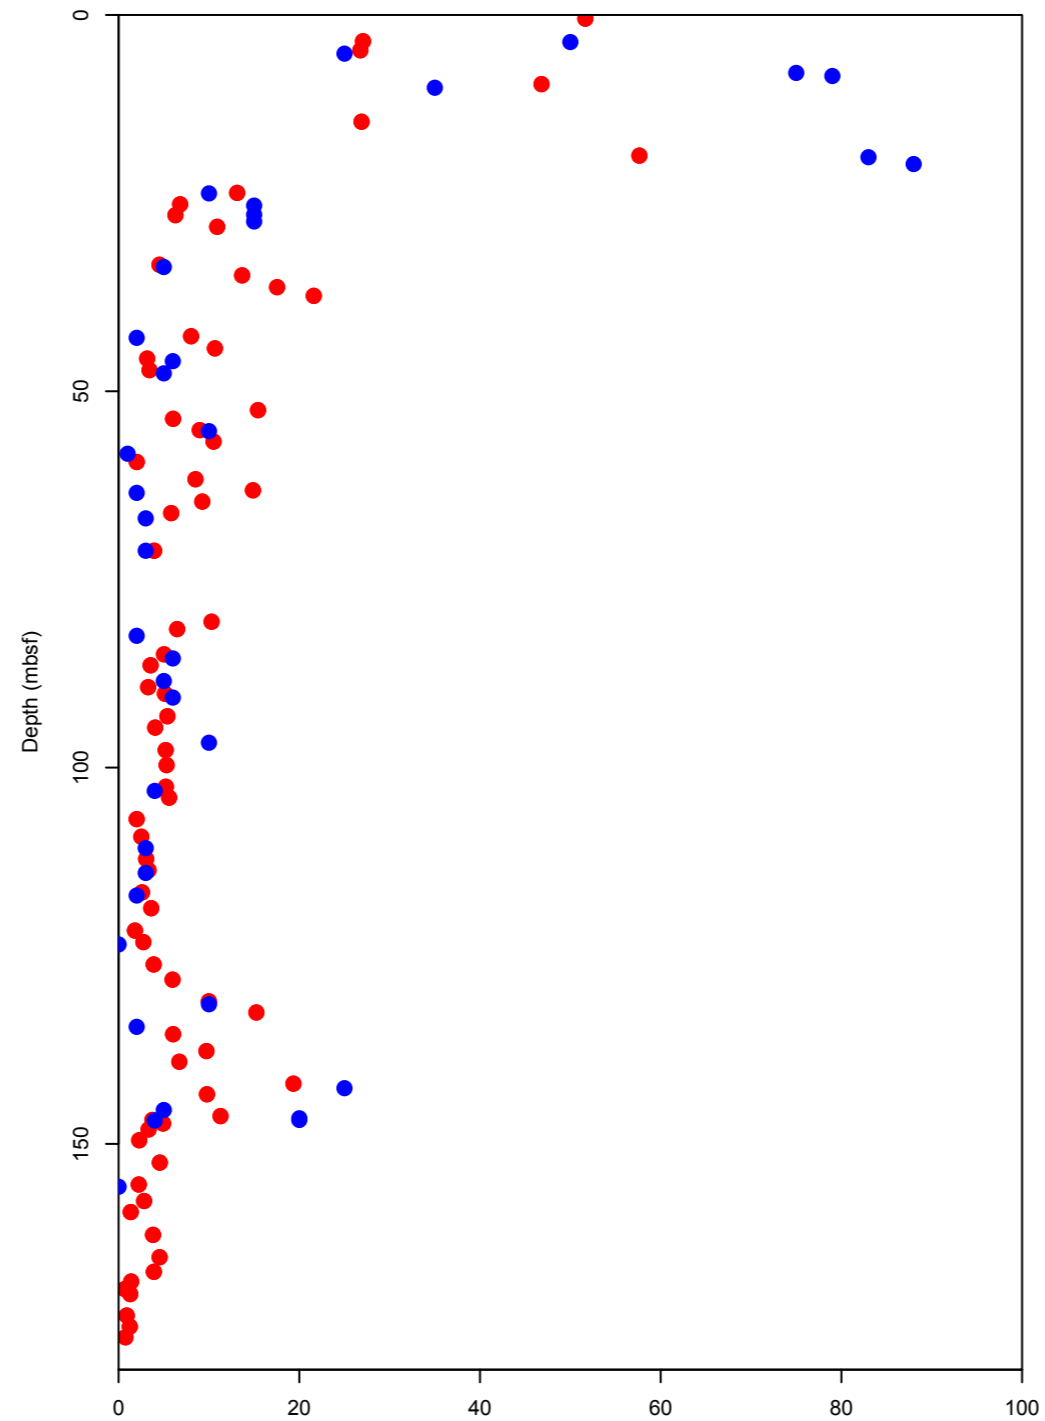

ODP 184-1143A

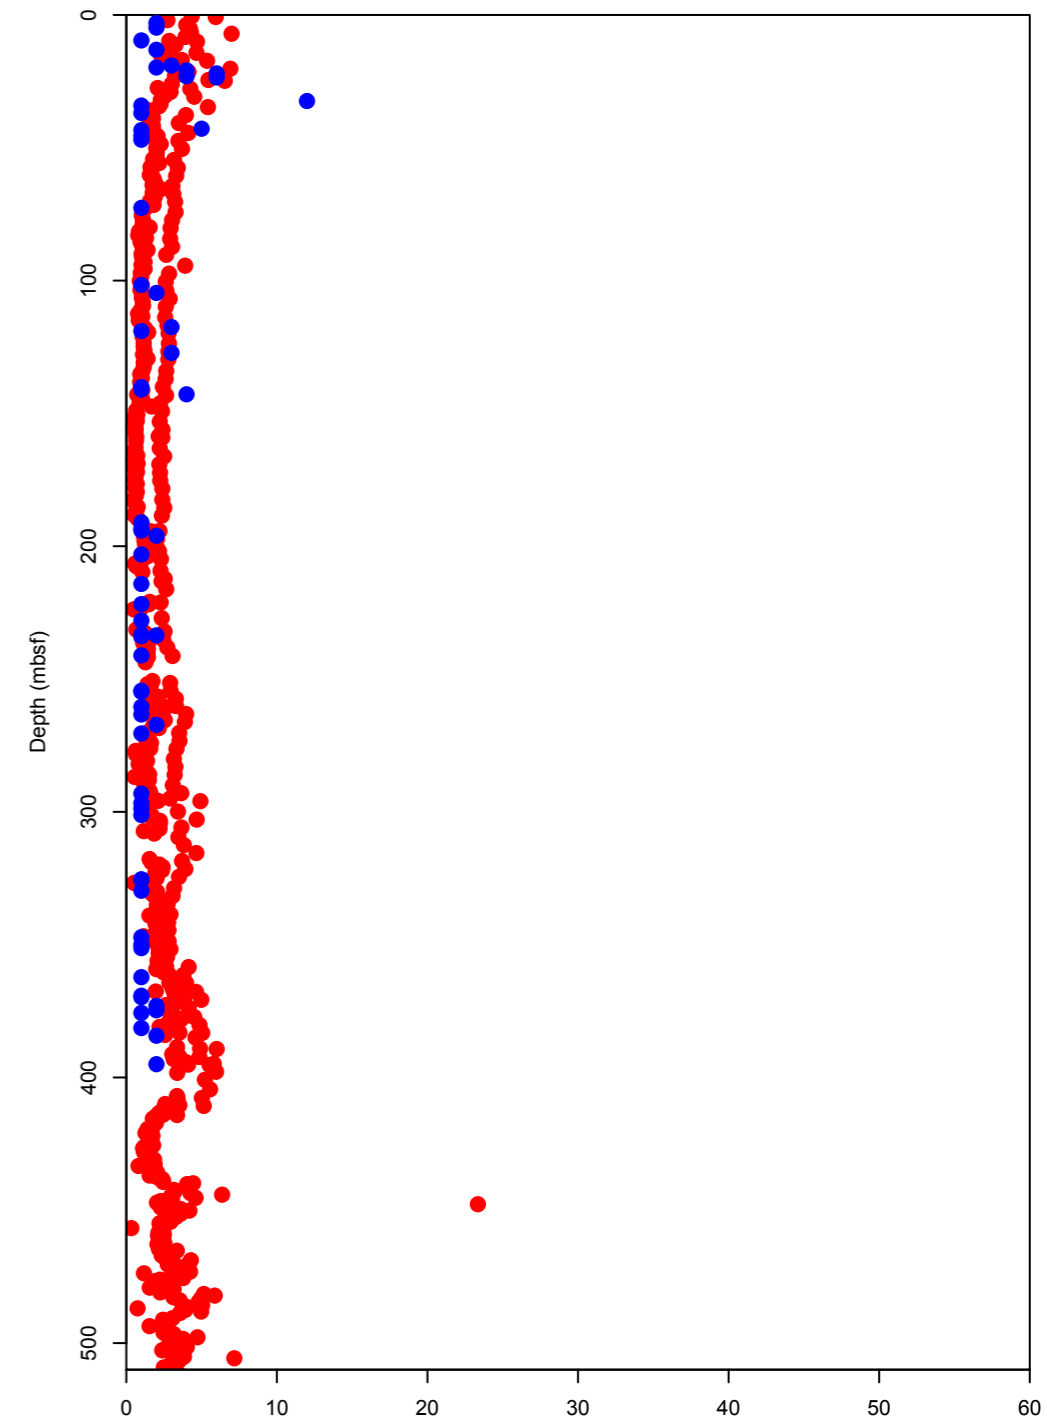

Supplement: Supplementary file 1 [file Renaudie - Quantifying the Cenozoic marine diatom deposition history - Supplementary Figure 2.pdf › Supplementary Files/Renaudie - Quantifying the Cenozoic marine diatom deposition history - Supplementary Figure 2.pdf]
